# Supplementary material for: Synthesis, structure, self-assembly and genotoxicity evaluation of a series of Mn-Anderson cluster based polyoxometalate–organic hybrids
Source: Royal Society of Chemistry journal article supplement (doi:10.1039/c5ra07581e), 2015-01-01
Supplement: c5ra07581e1.pdf [file c5ra07581e1.pdf]

## Electronic Supporting Information

### Synthesis, Structure, Self-assembly and Genotoxicity Evaluation of a Series of Mn-Anderson Cluster based Polyoxometalate-organic Hybrids

V. S. V. Satyanarayana,<sup>a‡</sup> Pulikanti Guruprasad Reddy<sup>a‡</sup> and Chullikkattil P. Pradeep<sup>a\*</sup>

<sup>a</sup>School of Basic Sciences, Indian Institute of Technology Mandi, Mandi - 175001, Himachal Pradesh, India.

E-mail: [pradeep@iitmandi.ac.in](mailto:pradeep@iitmandi.ac.in); Fax: (+91)1905 267 009.

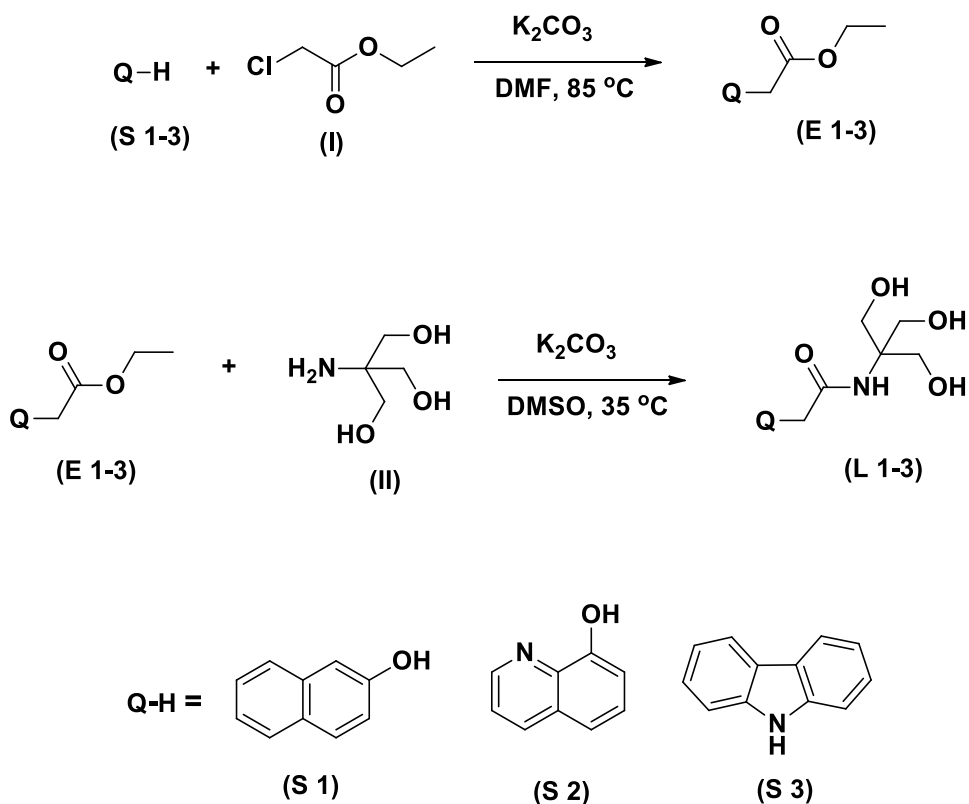

Scheme S1. Synthetic protocol of ligands L1-L3

## EXPERIMENTAL SECTION

### Materials and methods

All the chemicals and solvents were purchased from commercial sources and used as received. Acetonitrile (CH<sub>3</sub>CN) was dried using calcium hydride (CaH<sub>2</sub>) and dimethyl sulfoxide (DMSO, HPLC grade) was dried using molecular sieves (4 Å x 1.5 mm). 2-Naphthol, 8-hydroxy quinoline and 9 *H*-carbazole were purchased from Sigma Aldrich. Tetrabutylammoniumoctamolybdate, TBA<sub>4</sub>[Mo<sub>8</sub>O<sub>26</sub>], was prepared by following a literature procedure.<sup>1</sup> FT-IR spectra were recorded on a Perkin Elmer Spectrum 2 spectrophotometer using KBr pellets. <sup>1</sup>H and <sup>13</sup>C NMR spectra were recorded on Jeol JNM ECX 500 MHz spectrometer in DMSO-*d*<sub>6</sub>. TGA measurements were performed on NETZSCH STA 449 F1 JUPITER Series instrument. The heating rate employed was 10 °C/min under N<sub>2</sub> atmosphere over a temperature range of 25-1000 °C. ESI-MS spectra of compounds were recorded on Bruker HD compact instrument. The chromosomal aberrations were analyzed by using Nikon Eclipse LV100 POL optical microscope at 100X. Confocal images were taken on NIKON eclipse TI inverted microscope at 60X (oil merging) using TRITC, FITC and Cy-5 lasers. Dynamic light scattering studies were conducted on Malvern, Zetasizer instrument. Transmission Electron Microscope (TEM) analyses of hybrids **M1-M3** were conducted on FEI TECNAI F 20 HRTEM instrument operating at an accelerating voltage of 120 KV and FEI Morgagani 268 instruments.

### X-ray crystallography

Single crystal X-ray data were collected on Agilent SuperNova diffractometer, equipped with multilayer optics monochromated dual source (Cu and Mo) and Eos CCD detector, using Mo-Kα (0.71073 Å) radiation at temperature 150 K. Data acquisition, reduction and analytical face-index based absorption correction were done using the program CrysAlisPRO.<sup>2</sup> The structure was solved with ShelXS<sup>3</sup> and refined on *F*<sup>2</sup> by full matrix least-squares techniques using ShelXL<sup>3</sup> in Olex<sup>2</sup> (v.1.2) program package.<sup>4</sup> Anisotropic displacement parameters were applied for all the atoms, except hydrogen atoms and some less intensely scattered carbon and nitrogen atoms. H atoms were calculated into their positions or located from the electron density map and refined as riding atoms using isotropic displacement parameters.

The solvents present in the structure of **M2** was found to be highly disordered, so the SQUEEZE procedure of the PLATON program<sup>5</sup> was used, which suggested 316 electrons per unit cell. Before the use of SQUEEZE, the solvents present in the asymmetric unit resembled two molecules of dimethylformamide (DMF). The crystal was grown from DMF solvent as well. One molecule of DMF contains 40 electrons. Therefore, the 316 electrons suggested by SQUEEZE is close to the electron density required for 8 DMF molecules (320). So the contents of the unit cell were adjusted accordingly. 8 DMF molecules per unit cell correspond

to 2 DMF molecules per cluster hybrid. The crystal and structure refinement data for **M1** and **M2** are summarized in Table S4.

CCDC 1061758 (**M1**) and 1061759 (**M2**) contain the supplementary crystallographic data for this paper. These data can be obtained free of charge from The Cambridge Crystallographic Data Centre via [www.ccdc.cam.ac.uk/data\\_request/cifdata](http://www.ccdc.cam.ac.uk/data_request/cifdata).

### General procedure for the synthesis of E1-E3

Esters **E1-E3** were synthesized according to the literature procedure.<sup>6-9</sup> In 40 mL of dry DMF, starting material (**S1**, **S2** or **S3**, see Scheme S1) and potassium carbonate ( $K_2CO_3$ ) were stirred for 15 min. Ethyl chloroacetate was added to the above reaction mixture and stirred again for 24 hours at 85 °C under nitrogen atmosphere. After completion, the reaction mixture was poured into crushed ice and stirred for 10 min. The precipitated solid was separated by filtration, washed with excess of water and dried under vacuum.

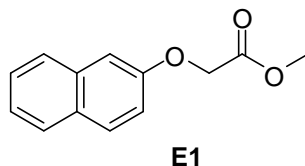

#### *Ethyl 2-(naphthalen-2-yloxy)acetate, E1*

The general procedure as above was followed using **S1** (6.0 g, 41.64 mmol),  $K_2CO_3$  (11.51 g, 83.29 mmol) and ethyl chloroacetate (5.08 g, 41.64 mmol) to get the compound **E1**. FT-IR:  $\nu_{max}/cm^{-1}$  2981 ( $\nu$  CH<sub>3</sub>), 2908 ( $\nu$  CH<sub>2</sub>), 1761 ( $\nu$  C=O), 1627-1596 ( $\nu$  C=C), 1206-1182-1078 ( $\nu$  C-O), 834-742 ( $\nu$  C-H)  $cm^{-1}$ .

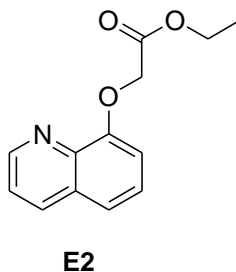

#### *Ethyl 2-(quinoline-8-yloxy)acetate, E2*

The general procedure as above was followed using **S2** (6.0 g, 41.36 mmol),  $K_2CO_3$  (11.43 g, 82.72 mmol) and ethyl chloroacetate (5.04 g, 41.36 mmol) to get the compound **E2**. FT-IR:

$\nu_{\max}/\text{cm}^{-1}$  2993 ( $\nu$  CH<sub>3</sub>), 1749 ( $\nu$  C=O), 1670, 1505-1450 ( $\nu$  C=C), 1377, 1322, 1224, 1121 ( $\nu$  C-O), 1084, 1011, 828 ( $\nu$  C-H)  $\text{cm}^{-1}$ .

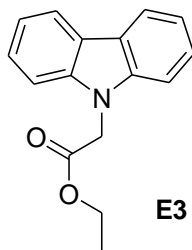

#### *Ethyl 2-(9H-carbazole-9-yl)acetate, E3*

The general procedure as above was followed using **S3** (6.0 g, 35.88 mmol), K<sub>2</sub>CO<sub>3</sub> (9.9 g, 71.76 mmol) and ethyl chloroacetate (4.3 g, 35.88 mmol) to get the compound **E3**. FT-IR:  $\nu_{\max}/\text{cm}^{-1}$  2987 ( $\nu$  CH<sub>3</sub>), 1932, 1889, 1737 ( $\nu$  C=O), 1602-1450 ( $\nu$  C=C), 1328-1224 ( $\nu$  C-O), 998, 1029, 848-748 ( $\nu$  C-H)  $\text{cm}^{-1}$ .

#### **General procedure for the synthesis of L1-L3**

In a sealed flask, esterified compound (**E1-E3**), tris(hydroxymethyl)aminomethane and K<sub>2</sub>CO<sub>3</sub> were suspended in dry DMSO (30 mL) and stirred at 35 °C for 24 h under nitrogen atmosphere. The reaction mixture was then poured into ice-water mixture and stirred for 10 min. The separated solid was filtered, washed with excess of water and dried at 50 °C for 1 day.

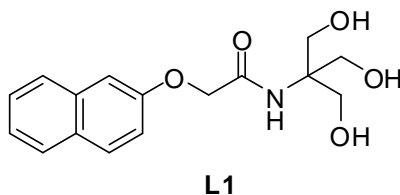

#### *N-(1,3-dihydroxy-2-(hydroxymethyl)propan-2-yl)-2-(naphthalen-2-yloxy)acetamide, L1*

The general procedure as above was followed using **E1** (3.0 g, 13.04 mmol), K<sub>2</sub>CO<sub>3</sub> (3.6 g, 26.08 mmol) and tris(hydroxymethyl)aminomethane (1.89 g, 15.65 mmol) to get the ligand **L1**. Yield: 2.2 g (55.25%). Mp. 128-132 °C. FT-IR:  $\nu_{\max}/\text{cm}^{-1}$  3371 ( $\nu$  OH), 3249 ( $\nu$  NH), 1657 ( $\nu$  C=O), 1535 ( $\nu$  C=C), 1261-1218-1060 ( $\nu$  C-O)  $\text{cm}^{-1}$ . <sup>1</sup>H NMR (500 MHz, DMSO-*d*<sub>6</sub>):  $\delta$  = 7.83 (m, 3H, ArH), 7.46 (t, 1H, *J* = 7.40 Hz, ArH), 7.36 (m, 2H, ArH), 7.29 (s, 1H, NH), 7.23 (dd, 1H, *J* = 2.25 & 8.57 Hz, ArH), 4.84 (t, 3H, *J* = 5.75 Hz, OH), 4.60 (s, 2H, OCH<sub>2</sub>), 3.62 (d, 6H, *J* = 5.70 Hz, tris OCH<sub>2</sub>). <sup>13</sup>C NMR (DMSO-*d*<sub>6</sub>, 125 MHz):  $\delta$  167.96, 155.30,

134.15, 129.56, 128.90, 127.62, 126.92, 126.63, 124.08, 118.51, 107.72, 67.25, 61.97, 60.05.  
ESI-MS:  $m/z$  [M+H] calcd. for C<sub>16</sub>H<sub>19</sub>NO<sub>5</sub>: 306.1297; found: 306.1336.

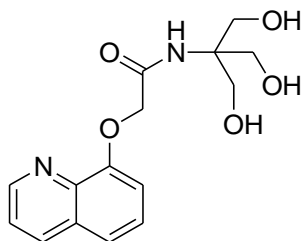

**L2**

*N*-(1,3-dihydroxy-2-(hydroxymethyl)propan-2-yl)-2-(quinolin-8-yloxy)acetamide, **L2**

The general procedure as above was followed using **E2** (3.0 g, 12.97 mmol), K<sub>2</sub>CO<sub>3</sub> (3.58 g, 25.94 mmol) and tris(hydroxymethyl)aminomethane (1.88 g, 15.56 mmol) to get the ligand **L2**. Yield: 2.60 g (65.44%). Mp. 130-136 °C. FT-IR:  $\nu_{\text{max}}/\text{cm}^{-1}$  3396 (v OH), 3158 (v NH), 1657 (v C=O), 1529-1505-1426 (v C=C), 1322, 1261-1108 (v C-O) cm<sup>-1</sup>. <sup>1</sup>H NMR (500 MHz, DMSO-*d*<sub>6</sub>):  $\delta$  = 8.88 (dd, 1H,  $J$  = 1.50 & 3.97 Hz, ArH), 8.34 (dd, 1H,  $J$  = 1.40 & 8.25 Hz, ArH), 7.76 (s, 1H, NH), 7.60-7.55 (m, 2H, ArH), 7.51 (t, 1H,  $J$  = 7.90 Hz, ArH), 7.28 (d, 1H,  $J$  = 7.50 Hz, ArH), 4.73 (t, 3H,  $J$  = 5.50 Hz, OH), 4.69 (s, 2H, OCH<sub>2</sub>), 3.60 (d, 6H,  $J$  = 5.35 Hz, tris OCH<sub>2</sub>). <sup>13</sup>C NMR (DMSO-*d*<sub>6</sub>, 125 MHz):  $\delta$  168.42, 153.71, 149.45, 139.91, 135.95, 129.07, 126.76, 122.03, 121.20, 112.34, 69.30, 62.06, 60.01. ESI-MS:  $m/z$  [M+H] calcd. for C<sub>15</sub>H<sub>18</sub>N<sub>2</sub>O<sub>5</sub>: 307.1249; found: 307.1288.

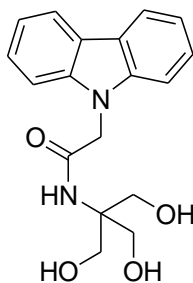

**L3**

2-(9H-carbazol-9-yl)-*N*-(1,3-dihydroxy-2-(hydroxymethyl)propan-2-yl)acetamide, **L3**

The general procedure as above was followed using **E3** (3.0 g, 11.84 mmol), K<sub>2</sub>CO<sub>3</sub> (3.2 g, 23.68 mmol) and tris(hydroxymethyl)aminomethane (1.72 g, 14.21 mmol) to get the ligand **L3**. Yield: 1.90 g (48.87%). Mp. 174-178 °C. FT-IR:  $\nu_{\text{max}}/\text{cm}^{-1}$  3371(v OH), 3292 (v NH), 1645 (v C=O), 1535-1462 (v C=C), 1328, 1267-1212-1121 (v C-O) cm<sup>-1</sup>. <sup>1</sup>H NMR (500 MHz, DMSO-*d*<sub>6</sub>):  $\delta$  = 8.13 (d, 2H,  $J$  = 7.70 Hz, ArH), 7.62 (s, 1H, NH), 7.52 (d, 2H,  $J$  = 8.15 Hz, ArH), 7.41 (t, 2H,  $J$  = 7.45 Hz, ArH), 7.19 (t, 2H,  $J$  = 7.40 Hz, ArH), 5.06 (s, 2H, NCH<sub>2</sub>), 4.67 (s, 3H, OH), 3.55 (s, 6H, tris OCH<sub>2</sub>). <sup>13</sup>C NMR (DMSO-*d*<sub>6</sub>, 125 MHz):  $\delta$  168.15, 140.60,

125.63, 122.13, 120.10, 118.93, 109.41, 62.47, 60.19, 45.72. ESI-MS (EI):  $m/z$  [M+H] calcd. for C<sub>18</sub>H<sub>20</sub>N<sub>2</sub>O<sub>4</sub>: 329.1457; found: 329.1496.

### <sup>1</sup>H NMR spectrum of **L1**

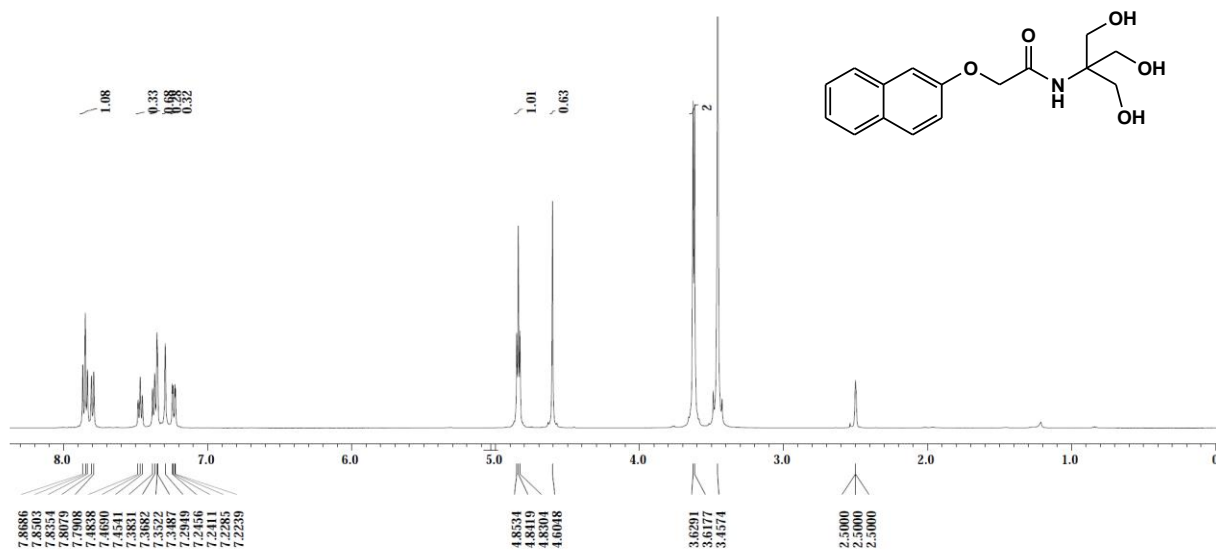

### <sup>13</sup>C NMR spectrum of **L1**

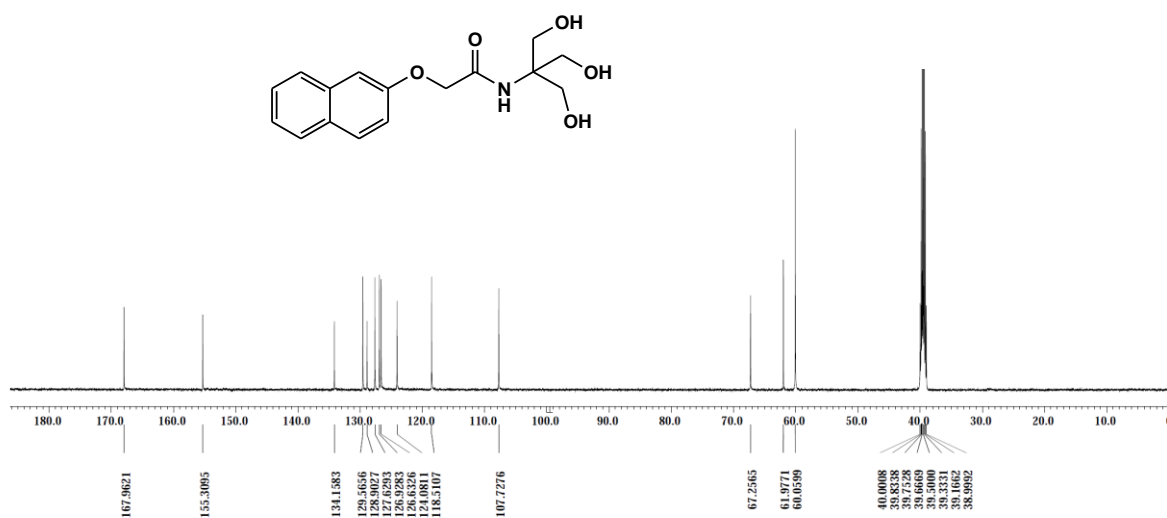

# <sup>1</sup>H NMR spectrum of L2

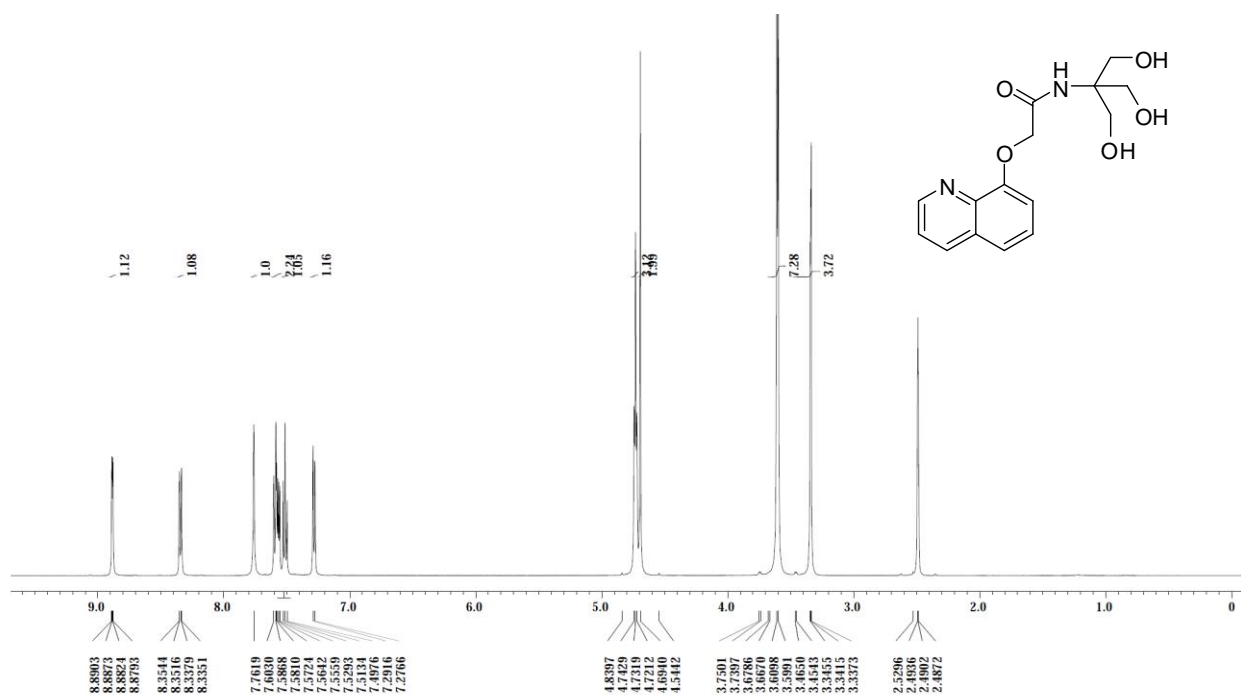

# <sup>13</sup>C NMR spectrum of L2

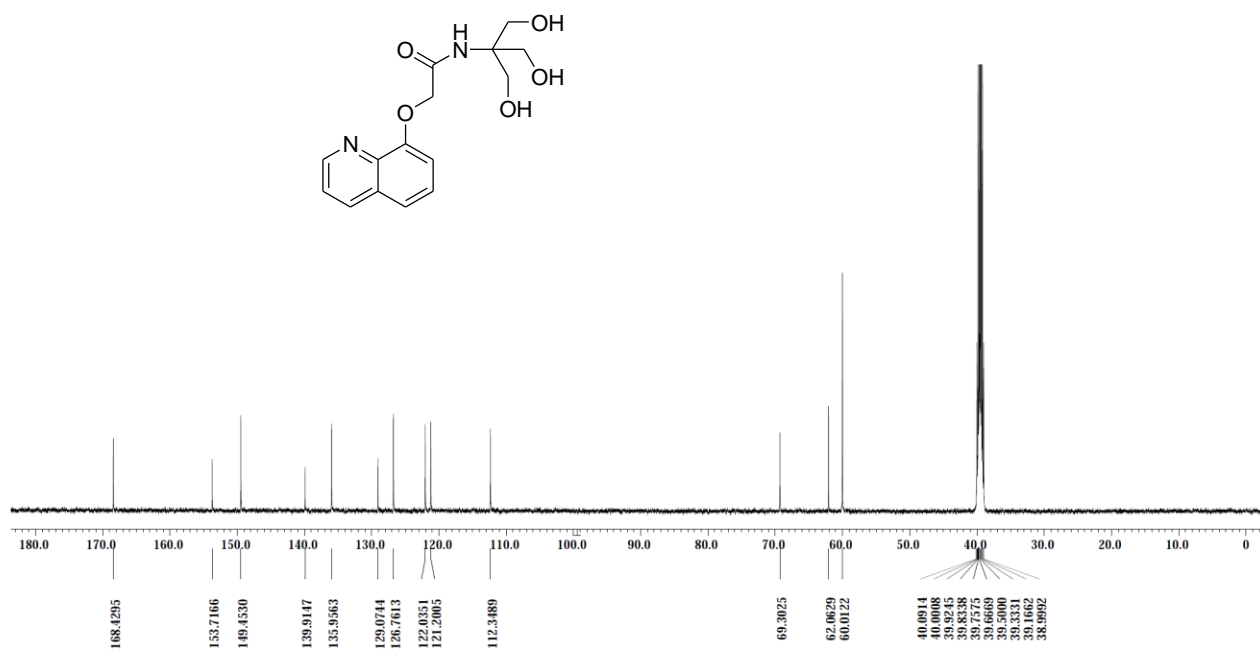

### $^1\text{H}$ NMR spectrum of L3

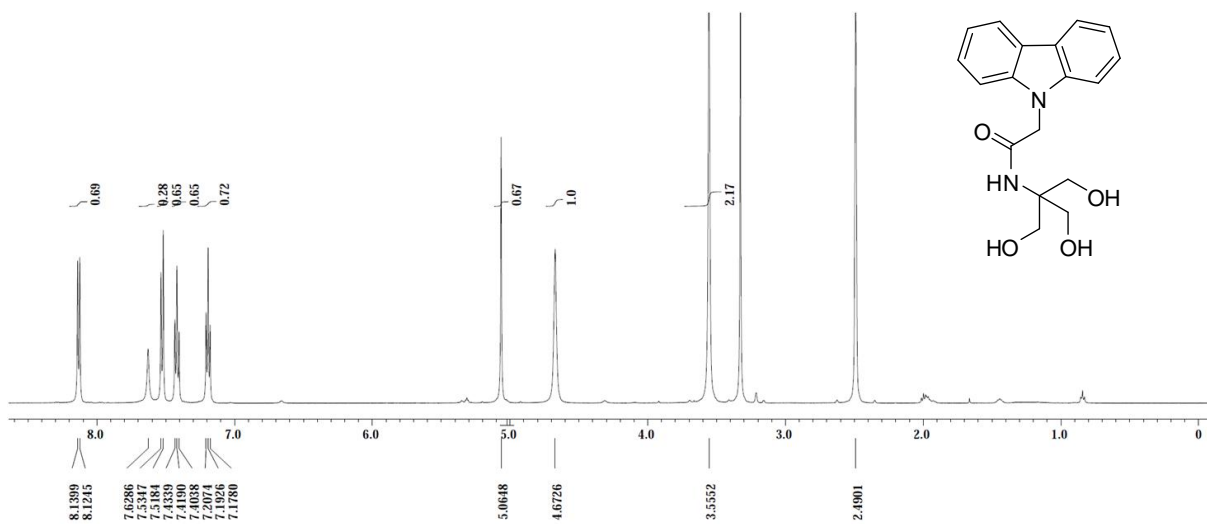

### $^{13}\text{C}$ NMR spectrum of L3

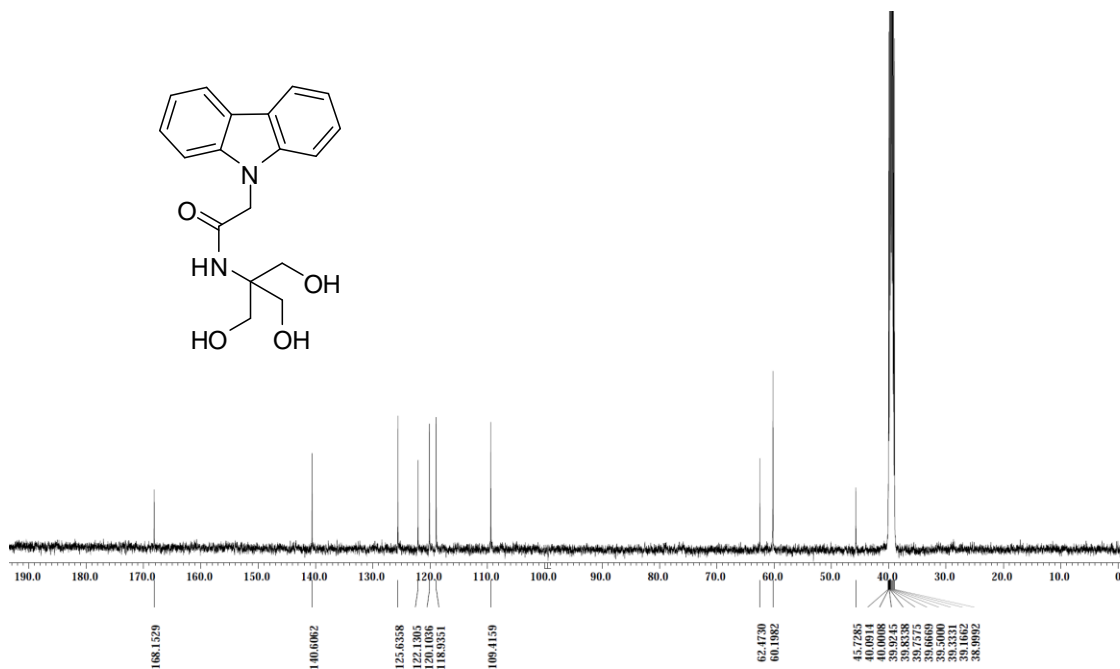



### General procedure for the synthesis of hybrids **M1-M3**

TBA<sub>4</sub>[Mo<sub>8</sub>O<sub>26</sub>] (1 equiv.), Mn(OAc)<sub>3</sub> (1.5 equiv.) and **L1-L3** (3.5 equiv.) were introduced into a 100 mL round bottom flask under argon atmosphere. 20 mL of dry acetonitrile was added and the resulting mixture was refluxed under argon for 3 days. The reaction mixture was then cooled down to room temperature, filtered and added drop-wise into excess of diethyl ether under vigorous stirring. The resulting precipitate was collected, washed successively with 30 mL of ethanol and 30 mL of diethyl ether and then dried overnight in a desiccator. For growing single crystals, 100 mg of the product was dissolved in 15 mL of dry acetonitrile or dimethylformamide and the solution was evaporated slowly at room temperature. After three days, red colored crystals of the hybrids were collected from the solution.

Due to the presence of paramagnetic Mn(III) centers in **M1-M3**, their NMR spectra showed broad peaks.<sup>10</sup>

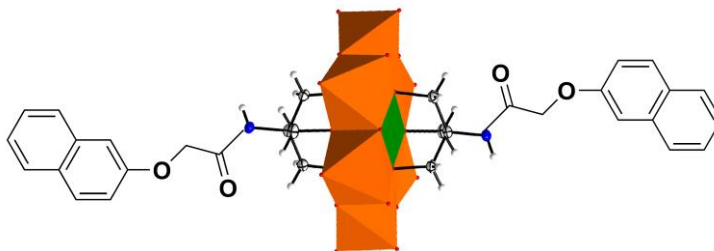

#### *TBA<sub>3</sub>[MnMo<sub>6</sub>O<sub>18</sub>{(OCH<sub>2</sub>)<sub>3</sub>C-NH-CO-C<sub>11</sub>H<sub>9</sub>O}<sub>2</sub>]<sub>2</sub>*, **M1**

The general procedure as above was followed using TBA<sub>4</sub>[Mo<sub>8</sub>O<sub>26</sub>] (0.3 g, 0.139 mmol), Mn(OAc)<sub>3</sub> (0.056 g, 0.209 mmol) and ligand **L1** (0.149 g, 0.487 mmol) to get the compound **M1**. Yield: 0.300 g (86.6 %). FT-IR:  $\nu_{\text{max}}/\text{cm}^{-1}$  2961-2872 ( $\nu$  C-H), 1701 ( $\nu$  C=O), 1628-1509-1481-1464 ( $\nu$  C=C), 1385, 1215, 1119, 1063, 1029 ( $\nu$  C-O), 921-938 ( $\nu$  Mo=O), 667 (Mo-O-Mo)  $\text{cm}^{-1}$ . <sup>1</sup>H NMR (DMSO-*d*<sub>6</sub>, 500 MHz):  $\delta$  = 7.81-7.29 (m, br, 16H, ArH & NH), 4.90 (s, br, 4H, ArOCH<sub>2</sub>), 3.13 (s, 24H, NCH<sub>2</sub>), 1.53-1.29-0.91 (m, 84H, NCH<sub>2</sub>CH<sub>2</sub>, NCH<sub>2</sub>CH<sub>2</sub>CH<sub>2</sub>, NCH<sub>2</sub>CH<sub>2</sub>CH<sub>2</sub>CH<sub>3</sub>), 64.66 (s, br, 12H, OCH<sub>2</sub>). <sup>13</sup>C NMR (DMSO-*d*<sub>6</sub>, 125 MHz):  $\delta$  168.80, 155.49, 133.73, 128.95, 128.31, 127.14, 126.49, 126.06, 123.35, 118.19, 106.98, 63.86, 57.19, 22.75, 19.01 and 13.31.

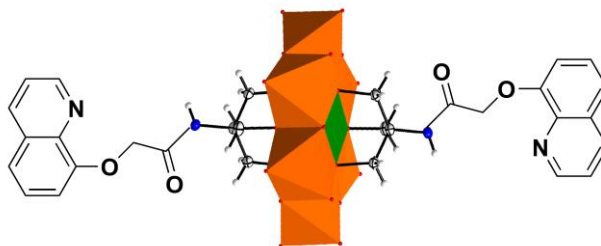

*TBA*<sub>3</sub>[*MnMo*<sub>6</sub>*O*<sub>18</sub>{(*OCH*<sub>2</sub>)<sub>3</sub>*C-NH-CO-C*<sub>10</sub>*H*<sub>8</sub>*NO*}<sub>2</sub>], **M2**

The general procedure as above was followed using *TBA*<sub>4</sub>[*Mo*<sub>8</sub>*O*<sub>26</sub>] (0.3 g, 0.139 mmol), *Mn*(*OAC*)<sub>3</sub> (0.056g, 0.209 mmol) and ligand **L2** (0.149 g, 0.487 mmol) to get the compound **M2**. Yield: 0.312 gm (89.96 %). FT-IR:  $\nu_{\max}/\text{cm}^{-1}$  2961-2869 ( $\nu$  C–H), 1684 ( $\nu$  C=O), 1562-1482 ( $\nu$  C=C), 1378, 1311, 1250, 1171, 1103, 1061, 1024 ( $\nu$  C–O), 926 ( $\nu$  Mo=O), 657 ( $\nu$  Mo–O–Mo)  $\text{cm}^{-1}$ . <sup>1</sup>H NMR (DMSO-*d*<sub>6</sub>, 500 MHz):  $\delta$  = 8.84 (sbr, 4H, ArH), 8.35 (sbr, 2H, NH), 7.63-7.38 (mbr, 8H, ArH), 5.07 (sbr, 4H, ArOCH<sub>2</sub>), 3.14 (s, 24H, NCH<sub>2</sub>), 1.54-1.28-0.90 (m, 84H, NCH<sub>2</sub>CH<sub>2</sub>, NCH<sub>2</sub>CH<sub>2</sub>CH<sub>2</sub>, NCH<sub>2</sub>CH<sub>2</sub>CH<sub>2</sub>CH<sub>3</sub>), 64.79 (sbr, 12H, OCH<sub>2</sub>). <sup>13</sup>C NMR (DMSO-*d*<sub>6</sub>, 125 MHz):  $\delta$  170.00, 154.26, 151.20, 140.01, 136.07, 128.84, 126.68, 121.91, 121.54, 114.40, 68.70, 57.24, 22.79, 19.07, 13.35.

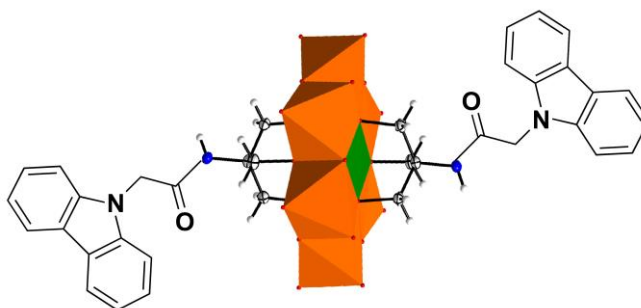

*TBA*<sub>3</sub>[*MnMo*<sub>6</sub>*O*<sub>18</sub>{(*OCH*<sub>2</sub>)<sub>3</sub>*C-NH-CO-C*<sub>13</sub>*H*<sub>10</sub>*N*}<sub>2</sub>], **M3**

The general procedure as above was followed using *TBA*<sub>4</sub>[*Mo*<sub>8</sub>*O*<sub>26</sub>] (0.3 g, 0.139 mmol), *Mn*(*OAC*)<sub>3</sub> (0.056 g, 0.209 mmol) and ligand **L3** (0.0160 g, 0.487 mmol) to get the compound **M3**. Yield: 0.340 gm (96.31%). FT-IR:  $\nu_{\max}/\text{cm}^{-1}$  2963-2874 ( $\nu$  C–H), 1696 ( $\nu$  C=O), 1560-1460 ( $\nu$  C=C), 1377, 1324, 1254, 1207, 1153, 1106, 1071, 1024 ( $\nu$  C–O), 912 ( $\nu$  Mo=O), 664 (Mo–O–Mo)  $\text{cm}^{-1}$ . <sup>1</sup>H NMR (DMSO-*d*<sub>6</sub>, 500 MHz):  $\delta$  = 8.13 (sbr, 4H, ArH), 7.47-7.20 (m, br, 14H, ArH & NH), 5.32 (sbr, 4H, ArOCH<sub>2</sub>), 3.11 (s, 24H, NCH<sub>2</sub>), 1.52-1.28-0.91 (m, 84H, NCH<sub>2</sub>CH<sub>2</sub>, NCH<sub>2</sub>CH<sub>2</sub>CH<sub>2</sub>, NCH<sub>2</sub>CH<sub>2</sub>CH<sub>2</sub>CH<sub>3</sub>), 64.69 (sbr, 12H, OCH<sub>2</sub>). <sup>13</sup>C NMR (DMSO-*d*<sub>6</sub>, 125 MHz):  $\delta$  168.88, 140.42, 125.49, 121.84, 119.82, 118.60, 109.15, 60.33, 57.27, 42.16, 22.81, 19.04, 13.36.

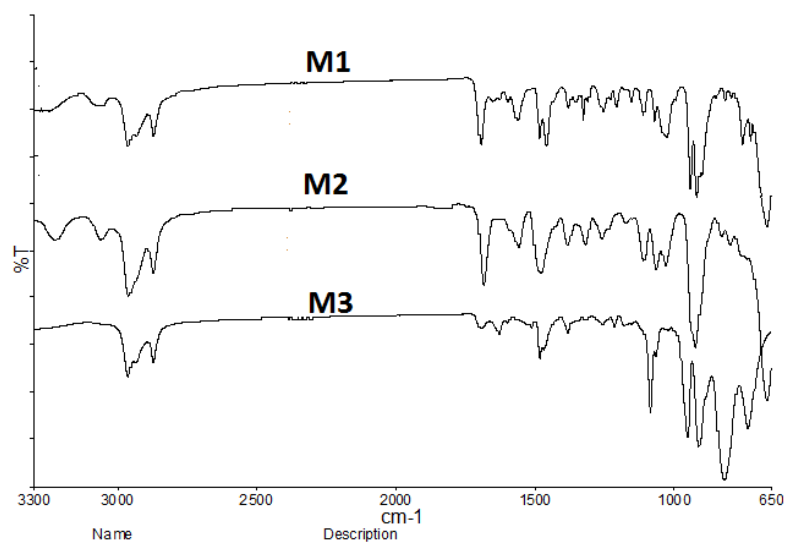

Figure S1. FT-IR spectra of hybrids M1-M3

### <sup>1</sup>H NMR spectrum of M1

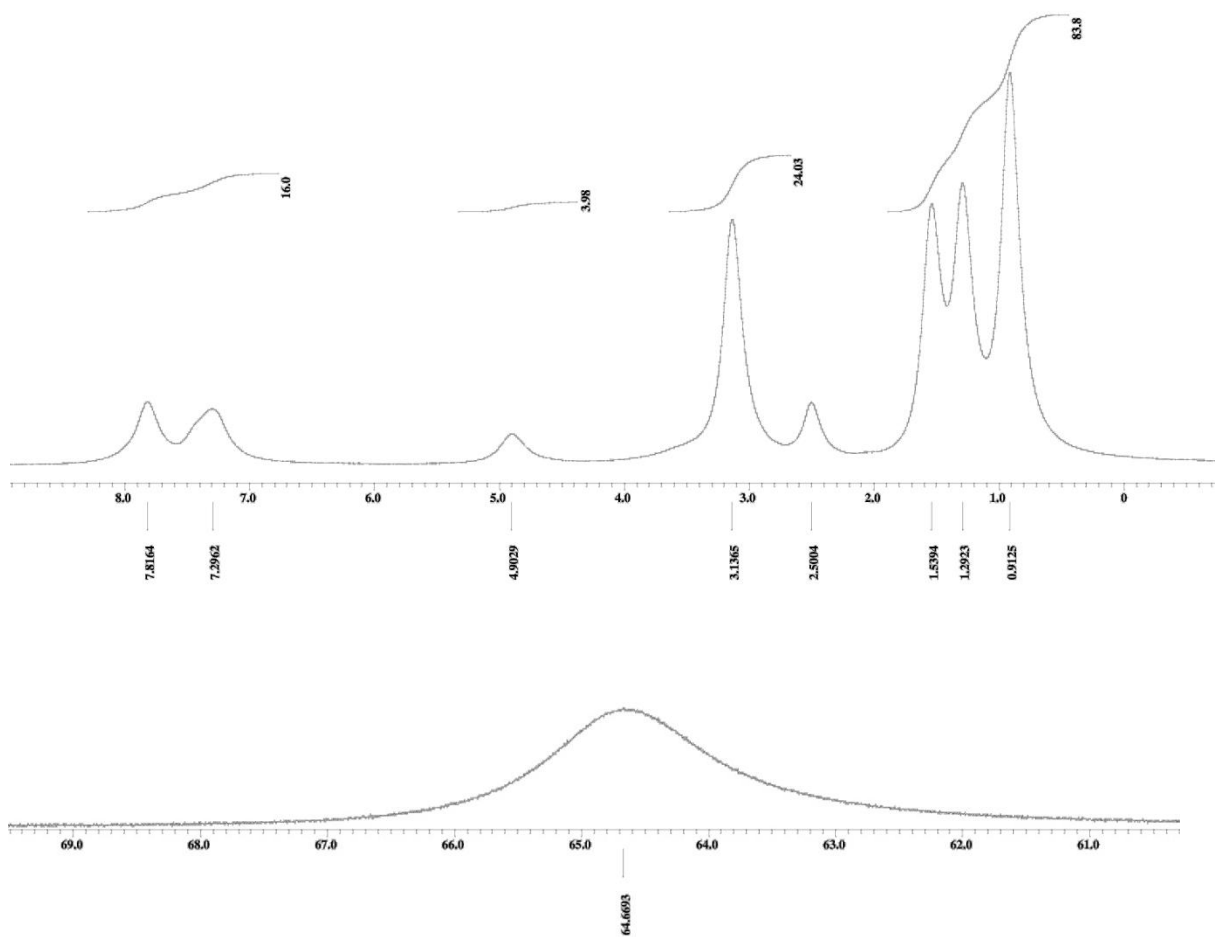

$^{13}\text{C}$  NMR spectrum of **M1**

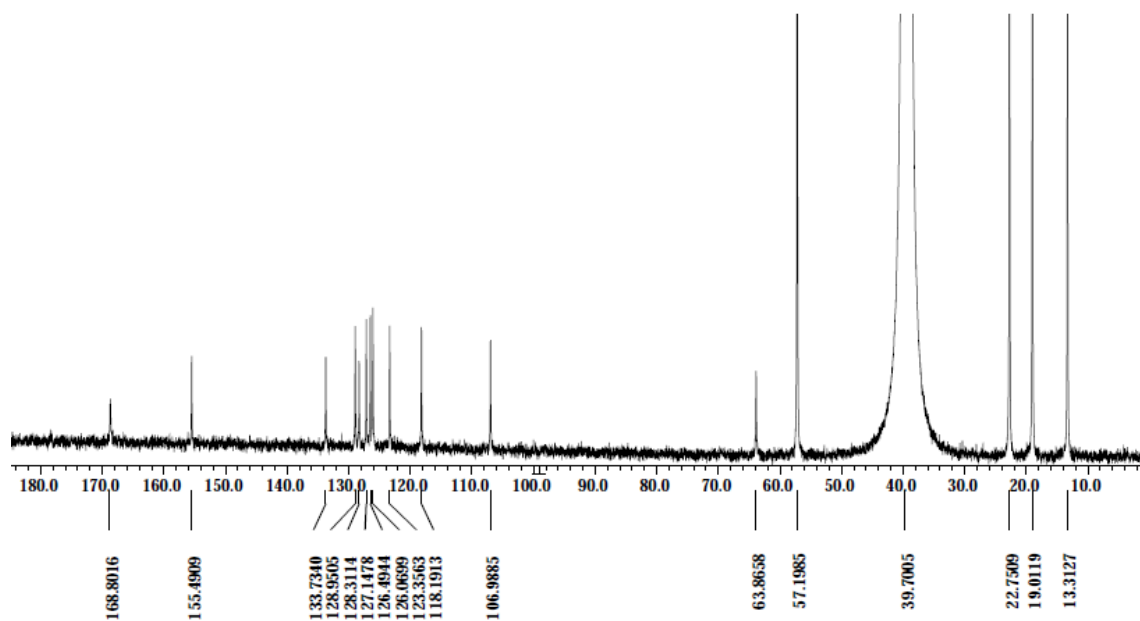

$^1\text{H}$  NMR spectrum of **M2**

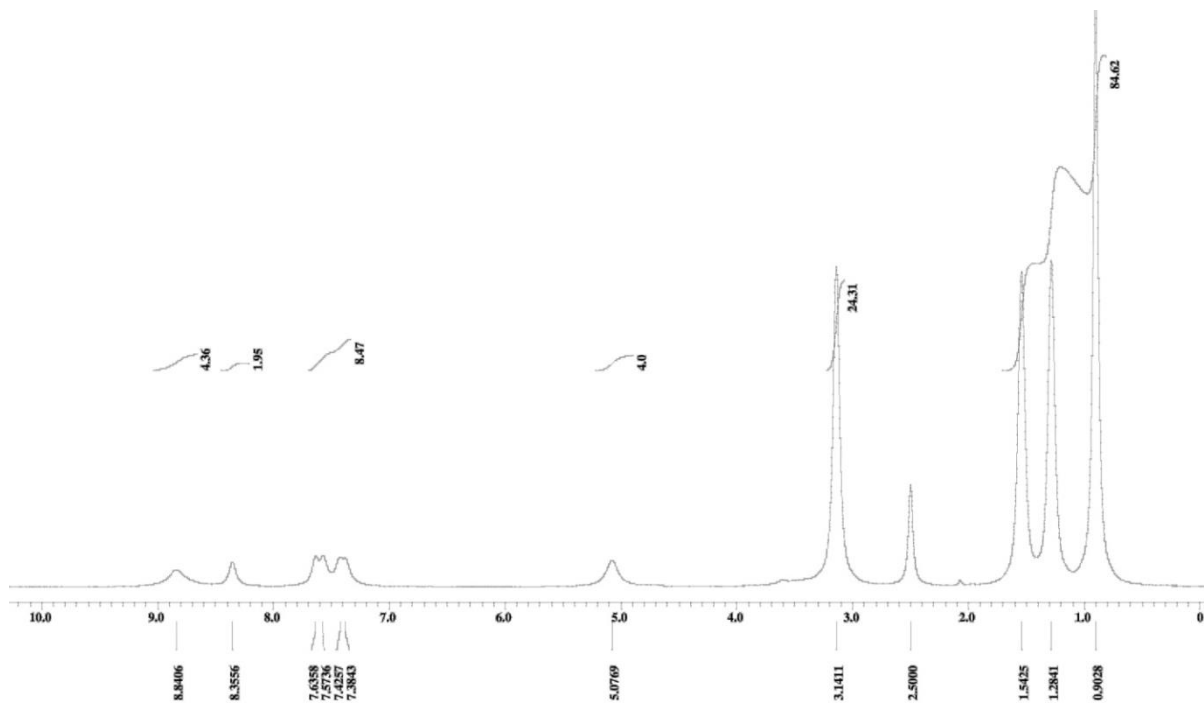

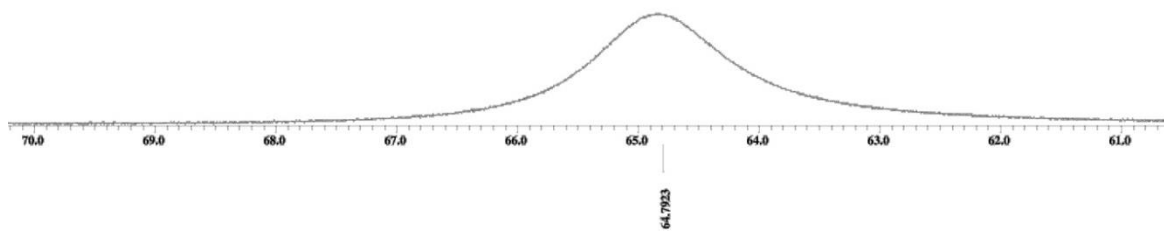

$^{13}\text{C}$  NMR spectrum of **M2**

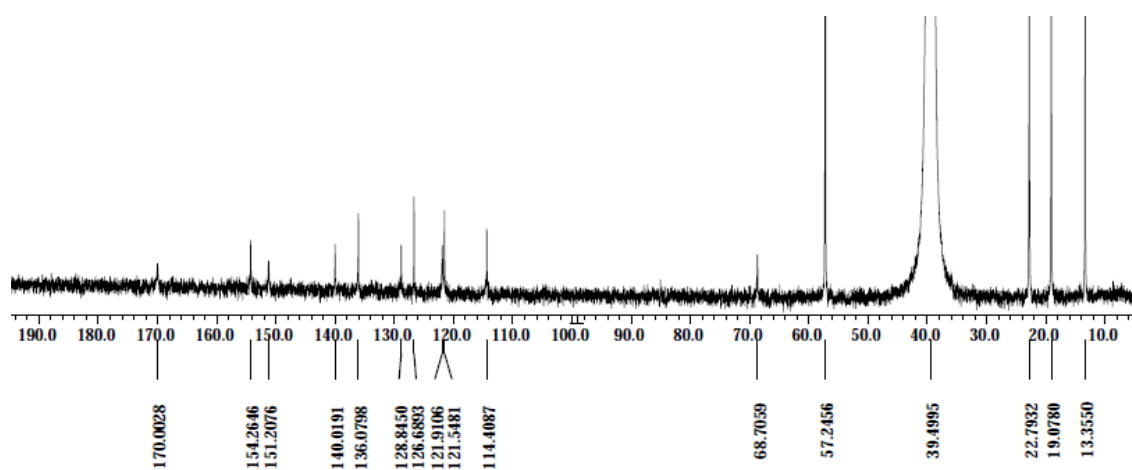

# <sup>1</sup>H NMR spectrum of M3

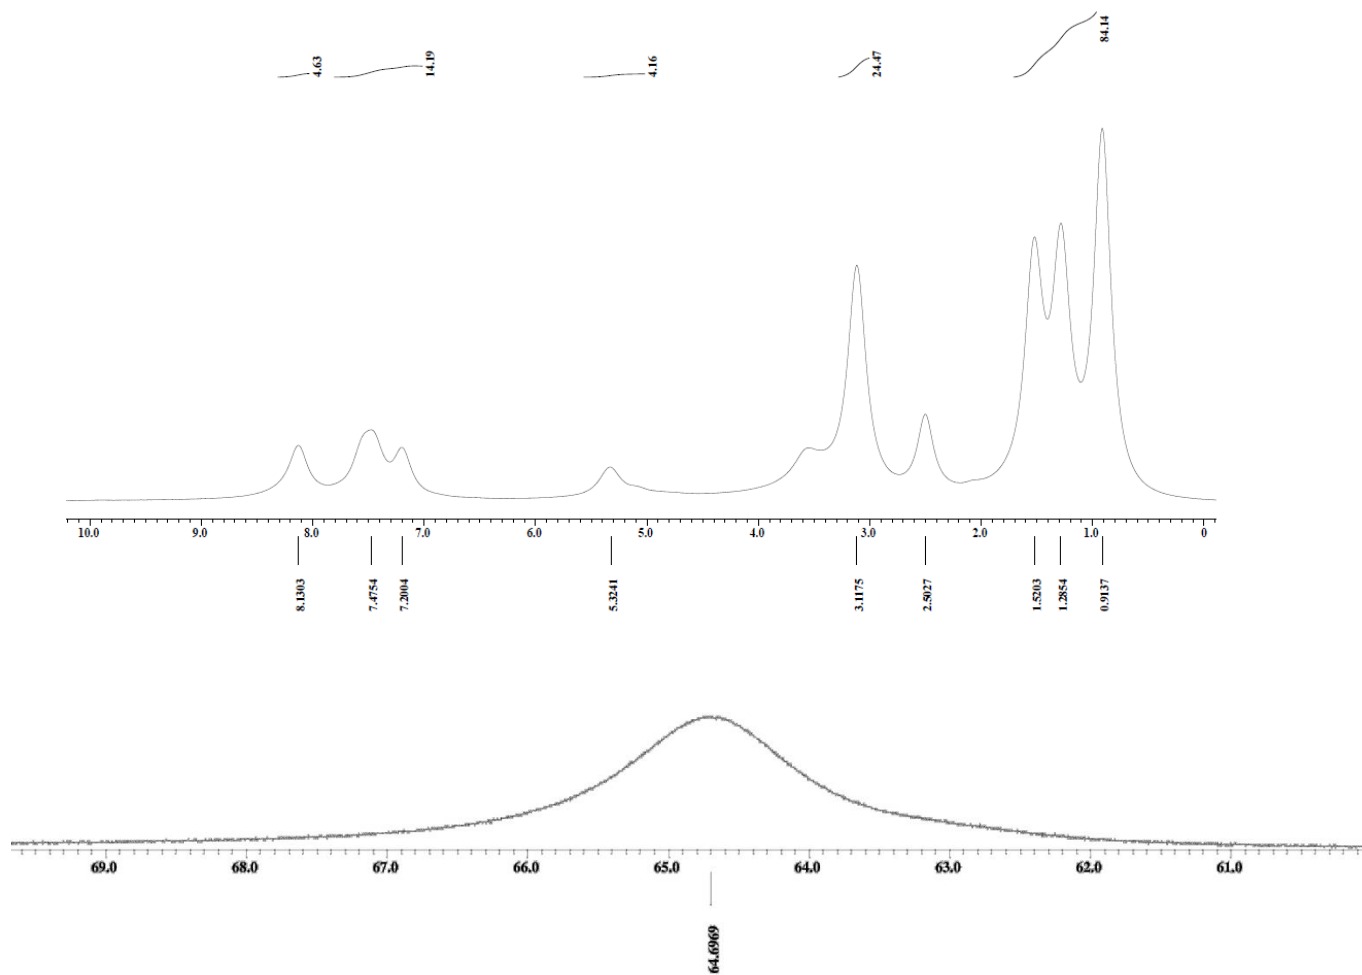

# <sup>13</sup>C NMR spectrum of M3

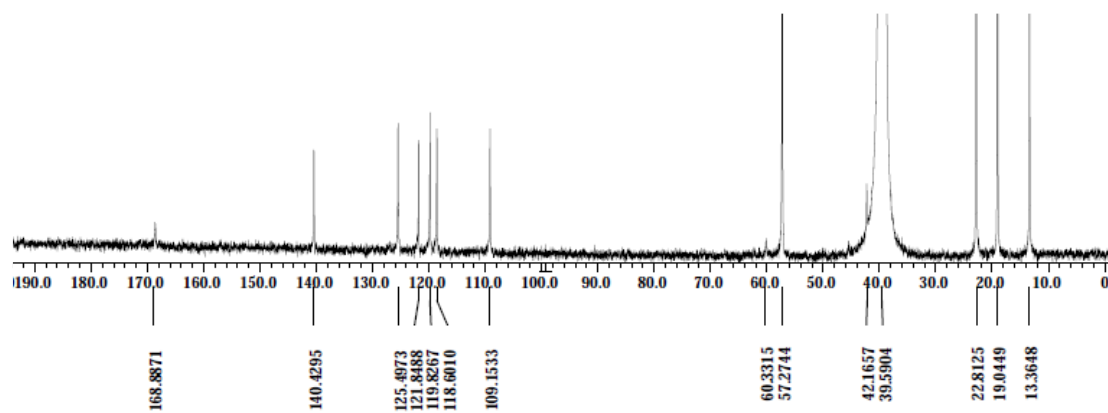

## ESI-MS data of hybrids M1-M3

### ESI-MS spectrum of M1

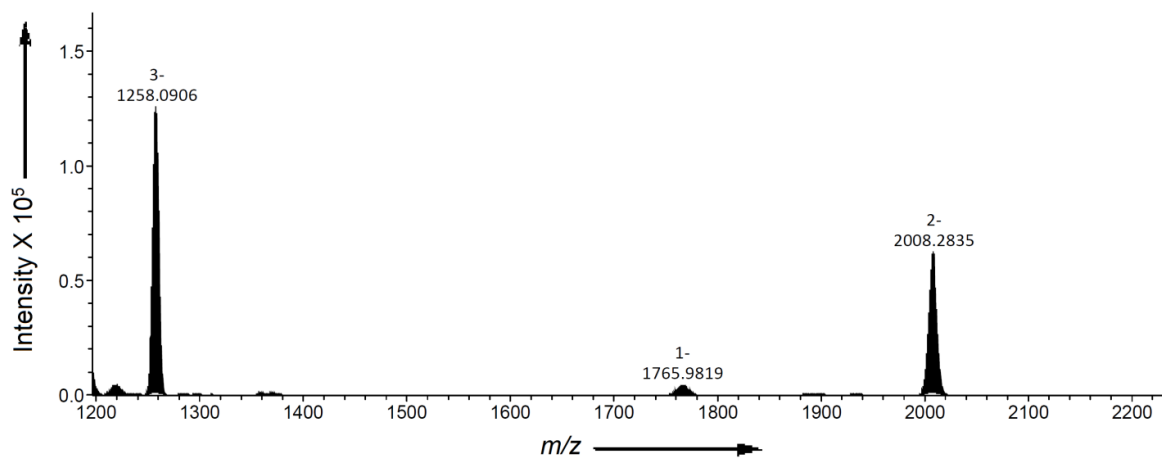

**Figure S2.** The negative ion mode ESI-MS spectrum of **M1** in acetonitrile

**Table S1.** Assignment of peaks in the mass spectrum of **M1**

| S.No | Formula                                                                                                         | Charge | m/z Calculated | m/z Observed |
|------|-----------------------------------------------------------------------------------------------------------------|--------|----------------|--------------|
| 1    | $\text{TBA}_3[\text{MnMo}_6\text{O}_{18}\{(\text{OCH}_2)_3\text{C-NH-CO-C}_{11}\text{H}_9\text{O}\}_2]_2$       | -3     | 1257.91        | 1258.09      |
| 2    | $(\text{TBA})\text{H}[\text{MnMo}_6\text{O}_{18}\{(\text{OCH}_2)_3\text{C-NH-CO-C}_{11}\text{H}_9\text{O}\}_2]$ | -1     | 1766.64        | 1765.98      |
| 3    | $\text{TBA}_4[\text{MnMo}_6\text{O}_{18}\{(\text{OCH}_2)_3\text{C-NH-CO-C}_{11}\text{H}_9\text{O}\}_2]_2$       | -2     | 2008.10        | 2008.28      |

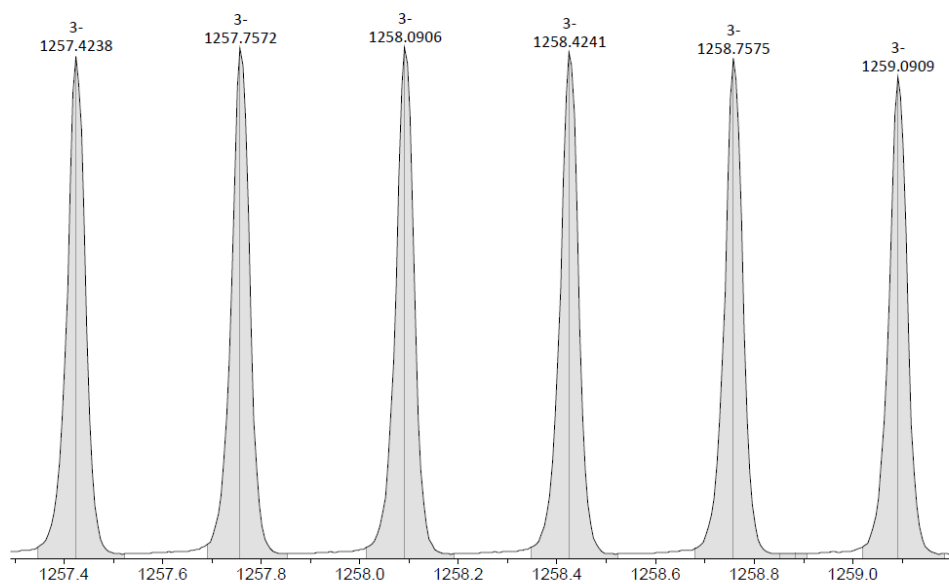

**Figure S3.** Zoom-in of the peak centered at around 1258.09 in the ESI-MS spectrum of **M1** to show the 3<sup>-</sup> charge state

### ESI-MS spectrum of **M2**

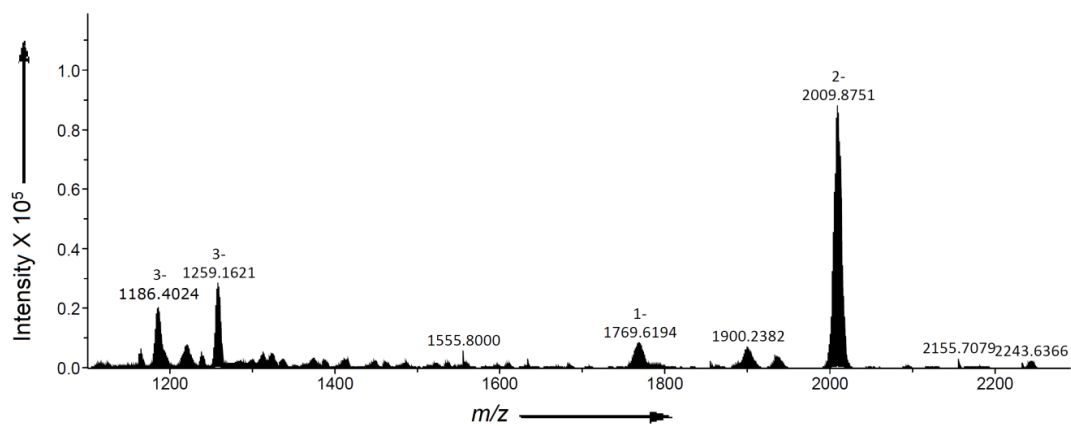

**Figure S4.** The negative ion mode ESI-MS spectrum of **M2** in acetonitrile



**Table S2.** Assignment of peaks in the mass spectrum of **M2**

| S. No | Formula                                                                                                               | Charge | m/z Calculated | m/z Observed |
|-------|-----------------------------------------------------------------------------------------------------------------------|--------|----------------|--------------|
| 1     | $(\text{TBA})_2\text{Na}[\text{MnMo}_6\text{O}_{18}\{(\text{OCH}_2)_3\text{C-NH-CO-C}_{10}\text{H}_8\text{NO}\}_2]_2$ | -3     | 1186.07        | 1186.40      |
| 2     | $\text{TBA}_3[\text{MnMo}_6\text{O}_{18}\{(\text{OCH}_2)_3\text{C-NH-CO-C}_{10}\text{H}_8\text{NO}\}_2]_2$            | -3     | 1259.23        | 1259.16      |
| 3     | $(\text{TBA})\text{H}[\text{MnMo}_6\text{O}_{18}\{(\text{OCH}_2)_3\text{C-NH-CO-C}_{10}\text{H}_8\text{NO}\}_2]$      | -1     | 1768.62        | 1769.61      |
| 4     | $\text{TBA}_4[\text{MnMo}_6\text{O}_{18}\{(\text{OCH}_2)_3\text{C-NH-CO-C}_{10}\text{H}_8\text{NO}\}_2]_2$            | -2     | 2010.07        | 2009.87      |

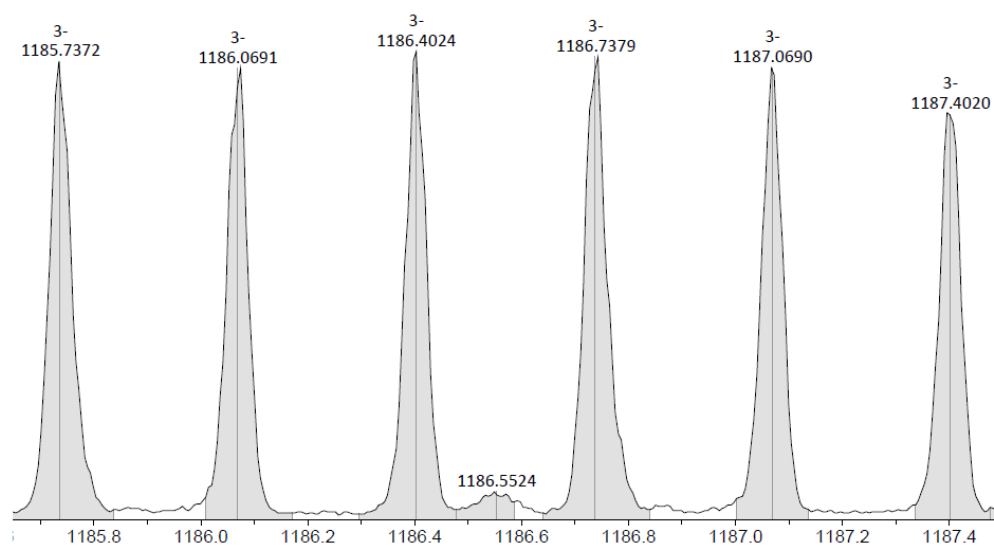

**Figure S5.** Zoom-in of the peak centered at around 1186.40 in the ESI-MS spectrum of **M2** to show the 3<sup>-</sup> charge state

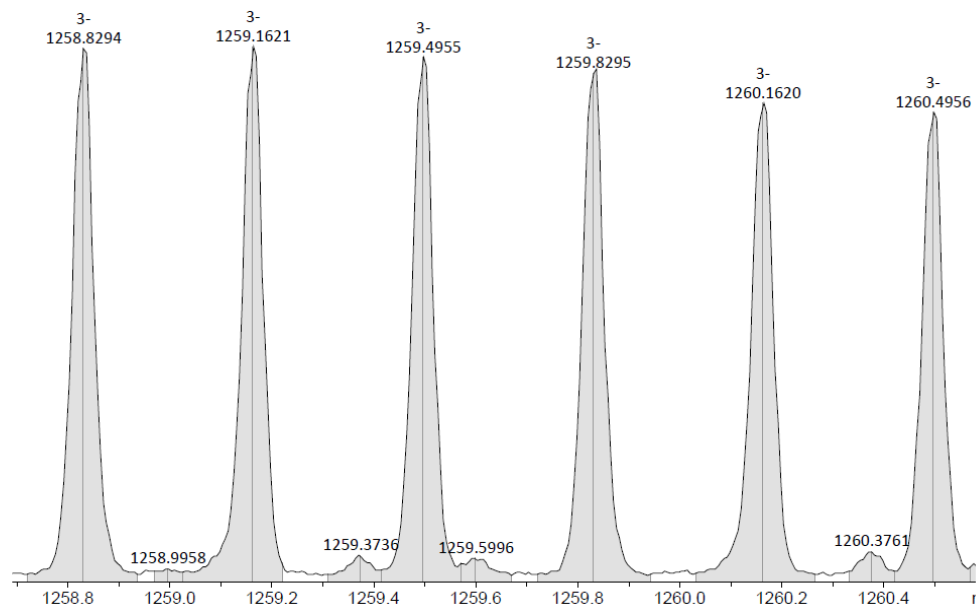

**Figure S6.** Zoom-in of the peak centered at around 1259.16 in the ESI-MS spectrum of **M2** to show the 3<sup>-</sup> charge state

ESI-MS spectrum of **M3**

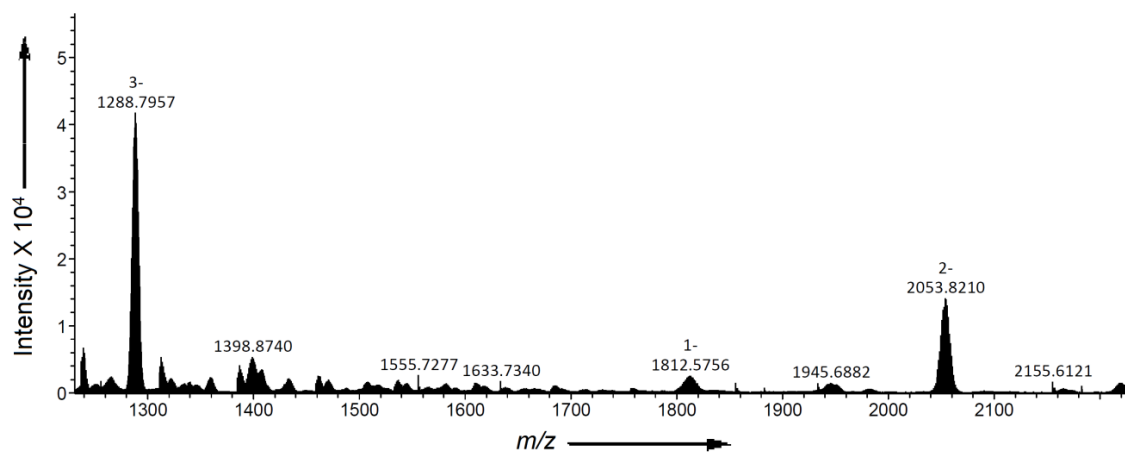

**Figure S7.** The negative ion mode ESI-MS spectrum of **M3** in acetonitrile

**Table S3.** Assignment of peaks in the mass spectrum of **M3**

| S.No | Formula                                                                                                            | Charge | m/z Calculated | m/z Observed |
|------|--------------------------------------------------------------------------------------------------------------------|--------|----------------|--------------|
| 1    | $\text{TBA}_3[\text{MnMo}_6\text{O}_{18}\{(\text{OCH}_2)_3\text{C-NH-CO-C}_{13}\text{H}_{10}\text{N}\}_2]$         | -3     | 1288.62        | 1288.79      |
| 2    | $(\text{TBA})\text{H}[\text{MnMo}_6\text{O}_{18}\{(\text{OCH}_2)_3\text{C-NH-CO-C}_{13}\text{H}_{10}\text{N}\}_2]$ | -1     | 1812.72        | 1812.57      |
| 3    | $\text{TBA}_4[\text{MnMo}_6\text{O}_{18}\{(\text{OCH}_2)_3\text{C-NH-CO-C}_{13}\text{H}_{10}\text{N}\}_2]$         | -2     | 2054.17        | 2053.82      |

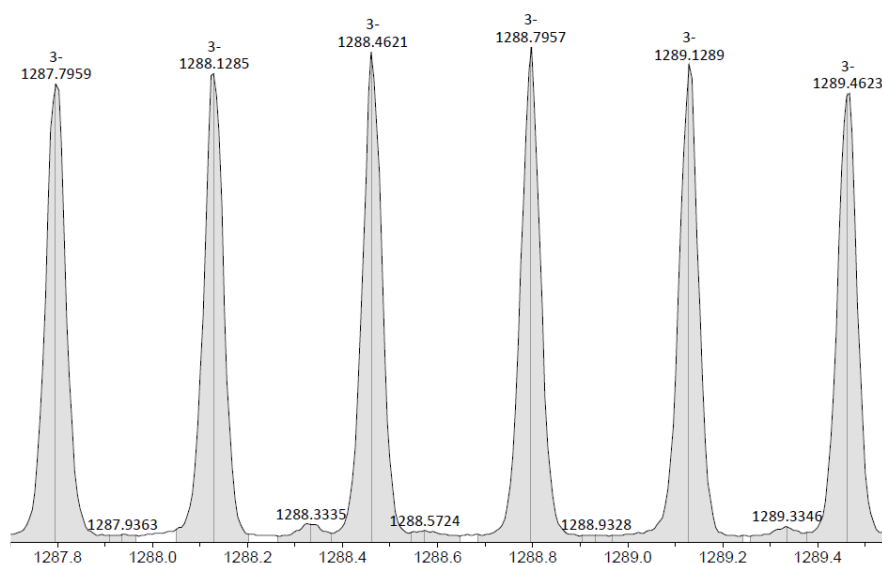

**Figure S8.** Zoom-in of the peak centered at around 1288.79 in the ESI-MS spectrum of **M3** to show the 3<sup>-</sup> charge state

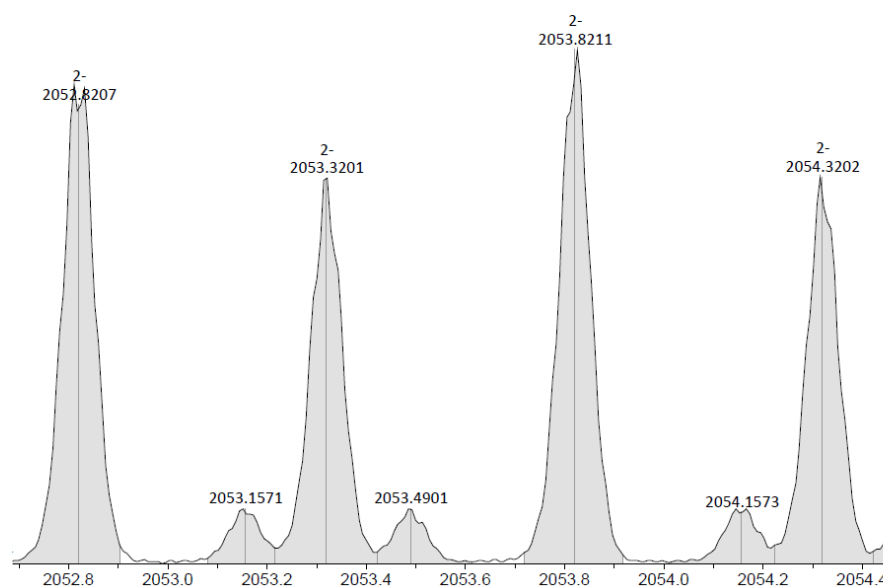

**Figure S9.** Zoom-in of the peak centered at around 2053.82 in the ESI-MS spectrum of **M3** to show the 2<sup>-</sup> charge state

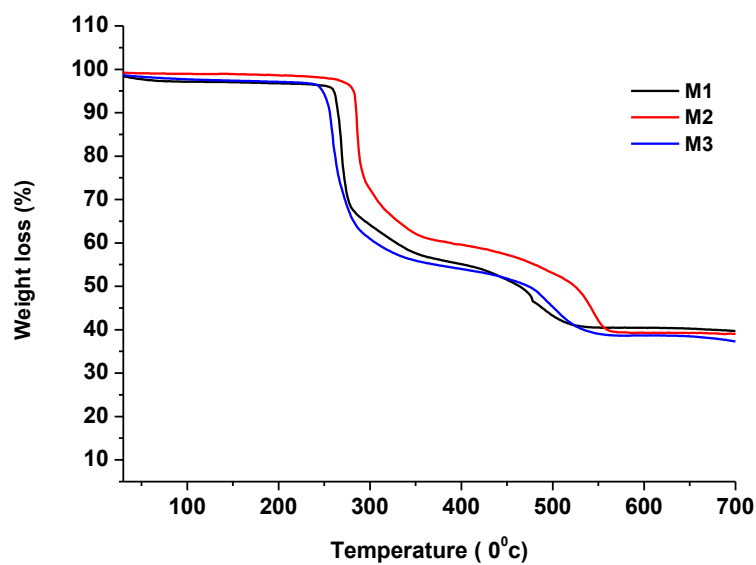

**Figure S10.** TGA plots of compounds **M1-M3** at a heating rate of 10 °C min<sup>-1</sup> under N<sub>2</sub> atmosphere

**Table S4.** Crystal and structure refinement data for **M1** and **M2**

| compounds                       | M1                                                                                 | M2                                                                                |
|---------------------------------|------------------------------------------------------------------------------------|-----------------------------------------------------------------------------------|
| Empirical formula               | C <sub>90</sub> H <sub>155</sub> MnMo <sub>6</sub> N <sub>10</sub> O <sub>28</sub> | C <sub>84</sub> H <sub>152</sub> MnMo <sub>6</sub> N <sub>9</sub> O <sub>30</sub> |
| Formula weight                  | 2455.81                                                                            | 2398.72                                                                           |
| Temperature                     | 150(2) K                                                                           | 150(2) K                                                                          |
| Wavelength                      | 0.71073 Å                                                                          | 0.71073 Å                                                                         |
| Crystal system                  | Monoclinic                                                                         | Monoclinic                                                                        |
| Space group                     | P 21/c                                                                             | P 21/c                                                                            |
| Unit cell dimensions            | $a = 26.4131(3) \text{ \AA}$                                                       | $a = 19.1909(3) \text{ \AA}$                                                      |
|                                 | $b = 23.2246(2) \text{ \AA}$ $\beta = 103.9230(10)^\circ$ .                        | $b = 19.5198(3) \text{ \AA}$ $\beta = 97.562(2)^\circ$ .                          |
|                                 | $c = 17.9467(2) \text{ \AA}$                                                       | $c = 27.7496(4) \text{ \AA}$                                                      |
| Volume                          | 10685.7(2) Å <sup>3</sup>                                                          | 10304.7(3) Å <sup>3</sup>                                                         |
| Z                               | 4                                                                                  | 4                                                                                 |
| Density (calculated)            | 1.527 Mg/m <sup>3</sup>                                                            | 1.546 Mg/m <sup>3</sup>                                                           |
| Absorption coefficient          | 0.871 mm <sup>-1</sup>                                                             | 0.902 mm <sup>-1</sup>                                                            |
| F(000)                          | 5064                                                                               | 4944                                                                              |
| Crystal size                    | 0.2883 x 0.2316 x 0.2048 mm <sup>3</sup>                                           | 0.1896 x 0.1670 x 0.1042 mm <sup>3</sup>                                          |
| Index ranges                    | -39<=h<=39, -33<=k<=33, -25<=l<=26                                                 | -25<=h<=25, -23<=k<=25, -35<=l<=36                                                |
| Reflections collected           | 126647                                                                             | 111668                                                                            |
| Independent reflections         | 35137 [R(int) = 0.0311]                                                            | 23582 [R(int) = 0.0285]                                                           |
| Completeness to theta = 25.242° | 99.8 %                                                                             | 100.0 %                                                                           |
| Refinement method               | Full-matrix least-squares on $F^2$                                                 | Full-matrix least-squares on $F^2$                                                |
| Data / restraints / parameters  | 35137 / 0 / 1119                                                                   | 23582 / 0 / 1093                                                                  |
| Goodness-of-fit on $F^2$        | 1.047                                                                              | 1.058                                                                             |
| Final R indices [I>2sigma(I)]   | R1 = 0.0401, wR2 = 0.0886                                                          | R1 = 0.0304, wR2 = 0.0739                                                         |
| R indices (all data)            | R1 = 0.0565, wR2 = 0.0974                                                          | R1 = 0.0365, wR2 = 0.0767                                                         |
| Largest diff. peak and hole     | 3.326 and -1.058 e.Å <sup>-3</sup>                                                 | 1.114 and -0.927 e.Å <sup>-3</sup>                                                |

**Table S5.** Details of the H-bonding interactions in **M1**

| D-H...A                | d(D-H) | d(H...A) | d(D...A)  | <(DHA) |
|------------------------|--------|----------|-----------|--------|
| C(28)-H(28)...O(8)     | 0.95   | 2.58     | 3.518(3)  | 166.06 |
| C(12)-H(12)...O(21)    | 0.95   | 2.55     | 3.437(3)  | 155.54 |
| C(1)-H(1A)...O(13)#1   | 0.99   | 2.55     | 3.163(3)  | 119.8  |
| C(2)-H(2B)...O(13)#1   | 0.99   | 2.46     | 3.059(3)  | 118.4  |
| C(3)-H(3B)...N(10)#1   | 0.99   | 2.68     | 3.336(4)  | 124.0  |
| C(17)-H(17A)...O(27)#2 | 0.99   | 2.27     | 2.896(3)  | 120.3  |
| C(33)-H(33A)...O(27)   | 0.99   | 2.28     | 3.246(3)  | 166.3  |
| C(33)-H(33B)...O(16)   | 0.99   | 2.48     | 3.461(3)  | 168.8  |
| C(41)-H(41B)...O(4)    | 0.99   | 2.47     | 3.345(3)  | 146.5  |
| C(38)-H(38B)...O(16)   | 0.99   | 2.49     | 3.429(4)  | 159.3  |
| C(46)-H(46A)...O(2)    | 0.99   | 2.58     | 3.369(4)  | 136.7  |
| C(46)-H(46B)...O(13)   | 0.99   | 2.60     | 3.529(4)  | 156.2  |
| C(61)-H(61A)...O(18)#3 | 0.99   | 2.44     | 3.348(3)  | 152.3  |
| C(50)-H(50B)...O(18)#3 | 0.99   | 2.53     | 3.481(4)  | 162.2  |
| C(16)-H(16)...N(10)#1  | 0.95   | 2.66     | 3.488(4)  | 146.1  |
| C(57)-H(57A)...O(16)   | 0.99   | 2.61     | 3.486(3)  | 147.2  |
| C(70)-H(70B)...N(8)    | 0.99   | 2.65     | 3.459(6)  | 139.5  |
| C(77)-H(77B)...O(5)#4  | 0.99   | 2.53     | 3.174(4)  | 122.3  |
| C(73)-H(73A)...O(2)    | 0.99   | 2.55     | 3.156(4)  | 119.1  |
| C(73)-H(73A)...O(9)#1  | 0.99   | 2.63     | 3.454(4)  | 141.1  |
| C(74)-H(74A)...N(10)#4 | 0.99   | 2.65     | 3.511(5)  | 145.2  |
| C(90)-H(90A)...O(3)    | 0.98   | 2.21     | 3.181(4)  | 168.6  |
| C(86)-H(86A)...O(27)   | 0.98   | 2.51     | 3.321(5)  | 140.0  |
| C(86)-H(86B)...O(19)   | 0.98   | 2.36     | 3.308(5)  | 162.7  |
| C(82)-H(82B)...O(15)   | 0.98   | 2.45     | 3.305(6)  | 146.1  |
| C(82)-H(82B)...O(18)   | 0.98   | 2.51     | 3.192(6)  | 126.9  |
| C(82)-H(82C)...N(7)#5  | 0.98   | 2.60     | 3.468(10) | 147.5  |
| C(88)-H(88C)...O(8)    | 0.98   | 2.34     | 3.238(6)  | 151.8  |
| C(84)-H(84B)...O(23)   | 0.98   | 2.49     | 3.386(6)  | 151.8  |
| C(1)-H(1A)...O(13)#1   | 0.99   | 2.55     | 3.163(3)  | 119.8  |
| C(2)-H(2B)...O(13)#1   | 0.99   | 2.46     | 3.059(3)  | 118.4  |

|                        |      |      |           |       |
|------------------------|------|------|-----------|-------|
| C(3)-H(3B)...N(10)#1   | 0.99 | 2.68 | 3.336(4)  | 124.0 |
| C(17)-H(17A)...O(27)#2 | 0.99 | 2.27 | 2.896(3)  | 120.3 |
| C(33)-H(33A)...O(27)   | 0.99 | 2.28 | 3.246(3)  | 166.3 |
| C(33)-H(33B)...O(16)   | 0.99 | 2.48 | 3.461(3)  | 168.8 |
| C(41)-H(41B)...O(4)    | 0.99 | 2.47 | 3.345(3)  | 146.5 |
| C(38)-H(38B)...O(16)   | 0.99 | 2.49 | 3.429(4)  | 159.3 |
| C(46)-H(46A)...O(2)    | 0.99 | 2.58 | 3.369(4)  | 136.7 |
| C(46)-H(46B)...O(13)   | 0.99 | 2.60 | 3.529(4)  | 156.2 |
| C(61)-H(61A)...O(18)#3 | 0.99 | 2.44 | 3.348(3)  | 152.3 |
| C(50)-H(50B)...O(18)#3 | 0.99 | 2.53 | 3.481(4)  | 162.2 |
| C(16)-H(16)...N(10)#1  | 0.95 | 2.66 | 3.488(4)  | 146.1 |
| C(57)-H(57A)...O(16)   | 0.99 | 2.61 | 3.486(3)  | 147.2 |
| C(70)-H(70B)...N(8)    | 0.99 | 2.65 | 3.459(6)  | 139.5 |
| C(77)-H(77B)...O(5)#4  | 0.99 | 2.53 | 3.174(4)  | 122.3 |
| C(73)-H(73A)...O(2)    | 0.99 | 2.55 | 3.156(4)  | 119.1 |
| C(73)-H(73A)...O(9)#1  | 0.99 | 2.63 | 3.454(4)  | 141.1 |
| C(74)-H(74A)...N(10)#4 | 0.99 | 2.65 | 3.511(5)  | 145.2 |
| C(90)-H(90A)...O(3)    | 0.98 | 2.21 | 3.181(4)  | 168.6 |
| C(86)-H(86A)...O(27)   | 0.98 | 2.51 | 3.321(5)  | 140.0 |
| C(86)-H(86B)...O(19)   | 0.98 | 2.36 | 3.308(5)  | 162.7 |
| C(82)-H(82B)...O(15)   | 0.98 | 2.45 | 3.305(6)  | 146.1 |
| C(82)-H(82B)...O(18)   | 0.98 | 2.51 | 3.192(6)  | 126.9 |
| C(82)-H(82C)...N(7)#5  | 0.98 | 2.60 | 3.468(10) | 147.5 |
| C(88)-H(88C)...O(8)    | 0.98 | 2.34 | 3.238(6)  | 151.8 |
| C(84)-H(84B)...O(23)   | 0.98 | 2.49 | 3.386(6)  | 151.8 |

---

Symmetry transformations used to generate equivalent atoms:

#1 -x+1, -y+1, -z+3 #2 -x, -y+1, -z+2 #3 -x, y+1/2, -z+5/2

#4 -x+1, y-1/2, -z+5/2 #5 x, -y+1/2, z+1/2

**Table S6.** Details of the H-bonding interactions in **M2**

| D-H...A                | d(D-H) | d(H...A) | d(D...A) | <(DHA) |
|------------------------|--------|----------|----------|--------|
| C(12)-H(12)...O(5)     | 0.93   | 2.30     | 3.176(5) | 155.74 |
| C(27)-H(27)...O(11) #3 | 0.93   | 2.55     | 3.272(4) | 134.55 |
| C(27)-H(27)...O(12) #3 | 0.93   | 2.41     | 3.263(4) | 152.06 |
| N(2)-H(2N)...N(4)      | 0.86   | 2.23     | 3.067(4) | 163.3  |
| N(1)-H(1N)...N(3)      | 0.86   | 2.31     | 3.163(4) | 169.5  |
| C(17)-H(17B)...O(27)   | 0.97   | 2.49     | 3.100(4) | 120.4  |
| C(4)-H(4A)...O(25)     | 0.97   | 2.38     | 2.985(4) | 120.1  |
| C(29)-H(29)...O(4)     | 0.93   | 2.59     | 3.455(5) | 155.7  |
| C(64)-H(64A)...O(25)#1 | 0.97   | 2.50     | 3.383(5) | 150.9  |
| C(71)-H(71B)...O(1)#1  | 0.97   | 2.47     | 3.380(5) | 155.5  |
| C(71)-H(71A)...O(25)#1 | 0.97   | 2.50     | 3.460(5) | 171.4  |
| C(67)-H(67B)...O(1)#1  | 0.97   | 2.59     | 3.471(5) | 151.6  |
| C(47)-H(47A)...O(8)#2  | 0.97   | 2.38     | 3.346(5) | 173.9  |
| C(75)-H(75A)...O(7)    | 0.97   | 2.50     | 3.190(5) | 127.7  |
| C(59)-H(59A)...O(11)#3 | 0.97   | 2.61     | 3.235(4) | 122.1  |
| C(63)-H(63A)...O(18)   | 0.97   | 2.36     | 3.199(4) | 144.0  |
| C(63)-H(63B)...O(7)    | 0.97   | 2.48     | 3.207(5) | 132.0  |
| C(56)-H(56A)...O(8)#2  | 0.97   | 2.55     | 3.139(5) | 119.0  |
| C(55)-H(55A)...O(12)#3 | 0.97   | 2.48     | 3.320(5) | 145.3  |
| C(55)-H(55B)...O(13)#3 | 0.97   | 2.44     | 3.182(4) | 132.9  |
| C(31)-H(31A)...N(4)#3  | 0.97   | 2.66     | 3.526(5) | 148.5  |
| C(31)-H(31B)...O(2)#3  | 0.97   | 2.54     | 3.511(5) | 175.6  |
| C(39)-H(39B)...O(5)    | 0.97   | 2.38     | 3.320(5) | 163.5  |
| C(40)-H(40B)...O(2)#3  | 0.97   | 2.64     | 3.379(5) | 133.7  |
| C(43)-H(43B)...O(6)    | 0.97   | 2.53     | 3.301(5) | 136.6  |
| C(72)-H(72B)...O(27)   | 0.97   | 2.40     | 3.364(5) | 171.4  |

Symmetry transformations used to generate equivalent atoms:

#1  $x, -y+3/2, z-1/2$  #2  $x-1, y, z$  #3  $-x+1, y-1/2, -z+1/2$



## Self-assembly behavior of hybrids M1-M3 at different concentrations

$10^{-3}$  M solutions of hybrids **M1-M3** in acetonitrile showed self-assembled structures of sizes **M1** = ~400 nm, **M2** = ~500 nm and **M3** = ~300 nm under TEM analyses. These results are in good agreement with the corresponding DLS data (**M1** = ~400-600 nm, **M2** = ~120-600 nm and **M3** = ~60-340 nm). To understand the effects of sample concentration in determining the self-assembly behaviors of hybrids **M1-M3** in solutions, DLS experiments were also conducted on  $10^{-4}$  &  $10^{-5}$  M solutions of **M1-M3** in acetonitrile. These studies revealed that the size of the self-assembled structures of **M1-M3** formed in solutions decreases with decrease in sample concentrations.<sup>11</sup> The DLS analysis results of hybrid compounds **M1-M3** are given in the Table S7.

**Table S7.** DLS data of hybrids **M1-M3** in different concentrations ( $10^{-3}$ ,  $10^{-4}$  and  $10^{-5}$  M in acetonitrile).

| Compounds | Concentration (ppm) | Particle size in DLS. |
|-----------|---------------------|-----------------------|
| <b>M1</b> | $10^{-3}$ M         | 400-600 nm            |
|           | $10^{-4}$ M         | 105-190 nm            |
|           | $10^{-5}$ M         | 37-68 nm              |
| <b>M2</b> | $10^{-3}$ M         | 120-600 nm            |
|           | $10^{-4}$ M         | 91-141 nm             |
|           | $10^{-5}$ M         | 32-43 nm              |
| <b>M3</b> | $10^{-3}$ M         | 60-340 nm             |
|           | $10^{-4}$ M         | 50-78 nm              |
|           | $10^{-5}$ M         | 8-15 nm               |

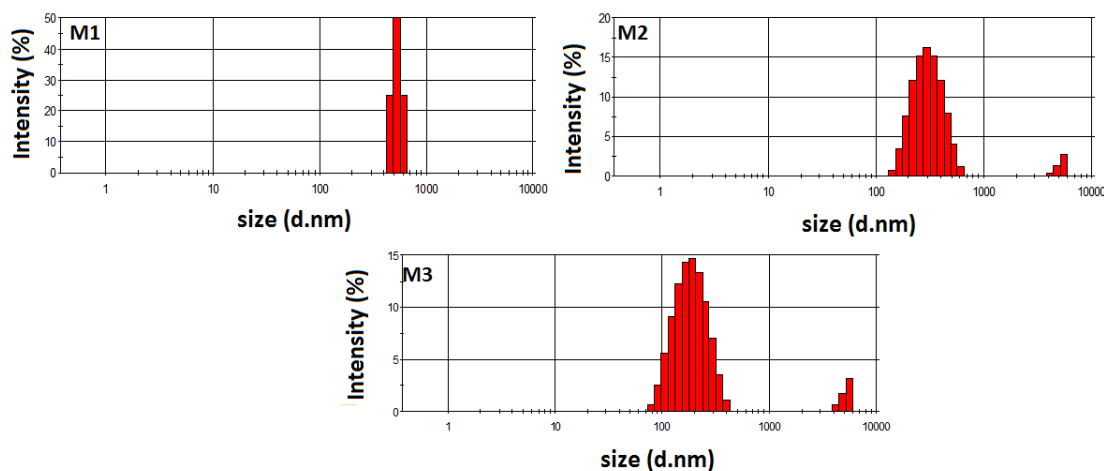

**Figure S11.** DLS plots of **M1-M3** hybrids in  $10^{-3}$ M acetonitrile solutions

### Self-assembly behaviors of hybrids **M1-M3** in mixed MeCN-H<sub>2</sub>O solvent system

The self-assembly properties of hybrids **M1-M3** in different MeCN-H<sub>2</sub>O solvent systems were investigated and the results are tabulated in Table S8. It can be noted that on increasing the percentage of water (10-30%) in the solvent mixture, the size of the self-assembled structures increases. Probably this is due to the fact that the hybrids become less and less soluble on increasing the percentage of water in the solution, which tend to increase their aggregation behavior.<sup>12</sup> To confirm the shape and size of the self-assembled structures in MeCN-H<sub>2</sub>O mixtures, TEM analyses were performed on one of the representative samples, i.e. solution of hybrid **M1** in MeCN-H<sub>2</sub>O (30% of water) system. This study confirmed that **M1** forms large self-assembled structures of ~600 nm size in this mixed solvent system in agreement with the DLS results obtained (Figure S13 and Table S8).

**Table S8.** DLS data of **M1-M3** hybrids in 10<sup>-4</sup> M MeCN-H<sub>2</sub>O (water content 10-30%) solvent system.

| <b>Compounds</b> | <b>% of water in 10<sup>-4</sup> M ACN/H<sub>2</sub>O system</b> | <b>Particle size in DLS.</b> |
|------------------|------------------------------------------------------------------|------------------------------|
| <b>M1</b>        | 10%                                                              | 140-190 nm                   |
|                  | 20%                                                              | 122-615nm                    |
|                  | 30%                                                              | 105-825nm                    |
| <b>M2</b>        | 10%                                                              | 220-326 nm                   |
|                  | 20%                                                              | 255-341 nm                   |
|                  | 30%                                                              | 295-458 nm                   |
| <b>M3</b>        | 10%                                                              | 58-91 nm                     |
|                  | 20%                                                              | 68-105 nm                    |
|                  | 30%                                                              | 91-122 nm                    |

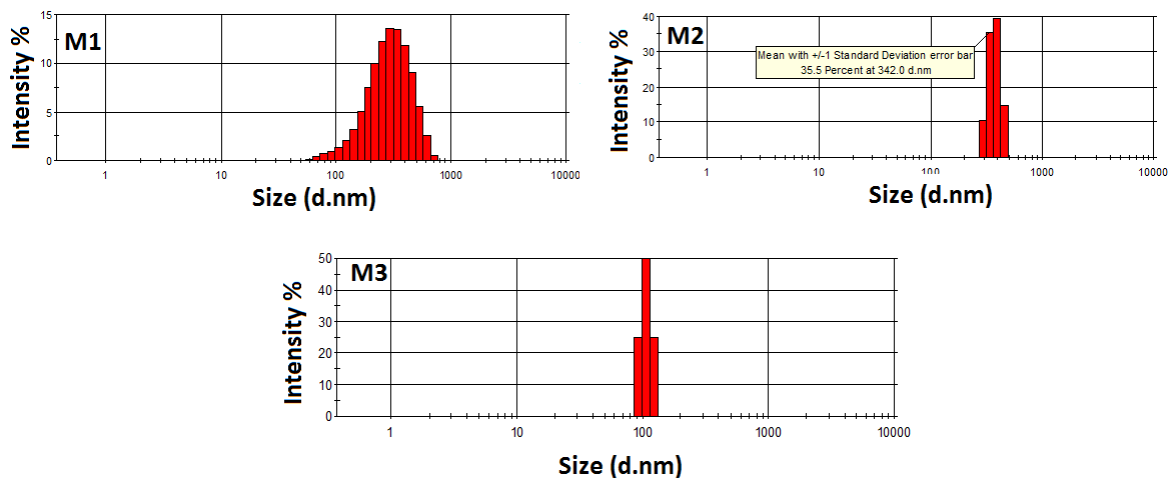

**Figure S12.** DLS graphs of **M1-M3** hybrids in  $10^{-4}$  M MeCN- $H_2O$  (water content 30%) solvent system

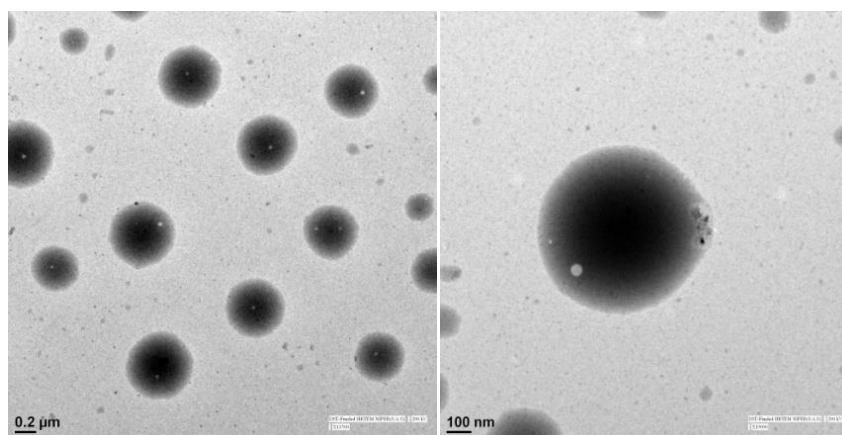

**Figure S13.** TEM images of the hybrid **M1** in ACN- $H_2O$  system (water content 30%)

### Self-assembly behaviors of hybrids M1-M3 in presence of an added salt TBAPF<sub>6</sub>

Self-assembly properties of hybrids **M1-M3** in presence of an added salt like TBAPF<sub>6</sub> were studied and the results are presented in Table S9. 3 ml  $10^{-3}$  M solutions of hybrids **M1-M3** in acetonitrile were selected for this study. The sequential addition of 5, 10, 15 and 20 mg of TBAPF<sub>6</sub> to this solution showed a decrease in the size of the self-assembled structures.<sup>11</sup>

TEM analyses were performed on a representative sample i.e. 3 ml solution of **M2** in MeCN in presence of low (15 mg) and high (50 mg) concentrations of TBAPF<sub>6</sub> to confirm the shape and size of the self-assembled structures. This study confirmed that the self-assembled structures formed are of size 350 nm in presence of 15 mg of TBAPF<sub>6</sub> and at higher concentrations of TBAPF<sub>6</sub> (50 mg), no self-assembled structures were observed, see Table S9 and Figures S14 and S15 for details.

These results are in agreement with the results of similar studies reported on Dawson cluster based hybrids in presence of added salts like tetrabutylammonium iodide (TBA.I) and dodecyltrimethylammonium bromide (DTMA·Br), where the self-assembled structures are found to disintegrate in highly ionic media.

**Table S9.** DLS data of 10<sup>-3</sup> M solution of hybrids **M1-M3** in MeCN in presence of different amounts (5 to 50 mg) of an added salt TBAPF<sub>6</sub>

| <b>Compounds</b> | <b>Amount of TBAPF<sub>6</sub> in 10<sup>-3</sup> M ACN solution</b> | <b>Particle size in DLS</b> |
|------------------|----------------------------------------------------------------------|-----------------------------|
| <b>M1</b>        | 5 mg                                                                 | 320-470 nm                  |
|                  | 15 mg                                                                | 190-250nm                   |
|                  | 30 mg                                                                | 43-91nm                     |
|                  | 50 mg                                                                | 8-28 nm                     |
| <b>M2</b>        | 5 mg                                                                 | 230-520 nm                  |
|                  | 15 mg                                                                | 320-400nm                   |
|                  | 30 mg                                                                | 68-105 nm                   |
|                  | 50 mg                                                                | 6-11 nm                     |
| <b>M3</b>        | 5 mg                                                                 | 130-220nm                   |
|                  | 10 mg                                                                | 90-150 nm                   |
|                  | 30 mg                                                                | 21-43 nm                    |
|                  | 50 mg                                                                | 1-4nm                       |

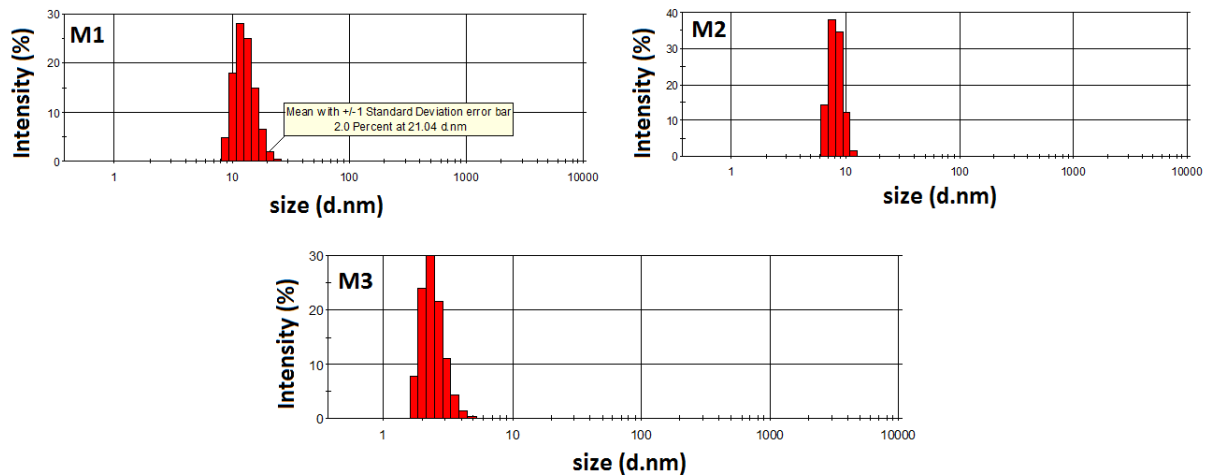

**Figure S14.** DLS plots of hybrids **M1-M3** in  $10^{-3}$ M MeCN solution (3 ml) in presence of 50 mg of TBAPF<sub>6</sub>

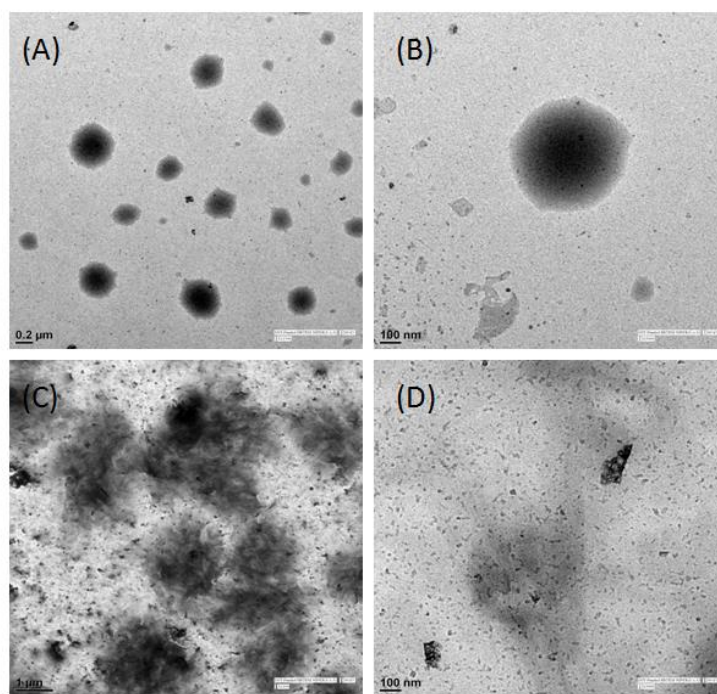

**Figure S15.** TEM images of hybrid **M2** in presence of 15 mg (images A and B) and 50 mg (images C and D) of TBAPF<sub>6</sub> in  $10^{-3}$  M MeCN solution (3 ml)

### Self-assembly behaviors of hybrids M1-M3 in mixed DMSO-H<sub>2</sub>O solvent system

Finally, the self-assembly behaviors of hybrids **M1-M3** in DMSO-H<sub>2</sub>O system were also studied. Solutions of hybrids **M1-M3** at 250 ppm concentration level in DMSO-H<sub>2</sub>O mixed solvent system (which was used for the genotoxic studies) were selected for this study. TEM analysis on these solutions revealed the formation of spherical assemblies of the hybrids with sizes: **M1**, ~50 nm; **M2**, ~80 nm and **M3**, ~130 nm as shown in Fig. S16, which are in good agreement with the DLS results (**M1**, ~ 58-78 nm; **M2**, ~70-110 nm and **M3**, ~ 141-220 nm) as well, see Figures S16 and S17.

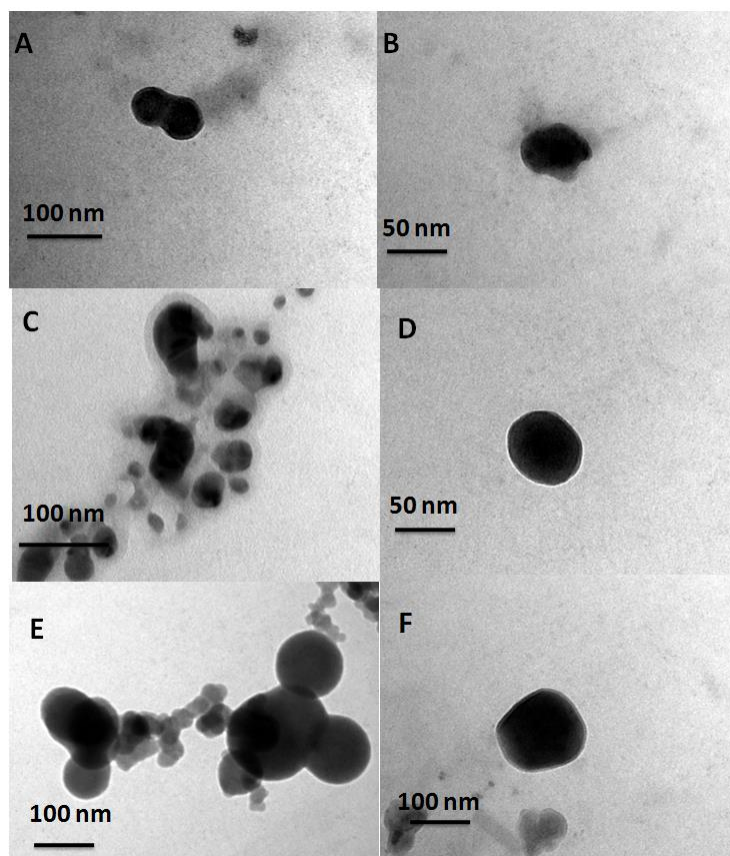

**Figure S16.** TEM images of the hybrids **M1** (A-B), **M2** (C-D) and **M3** (E-F) at 250 ppm concentration in mixed DMSO-H<sub>2</sub>O solvent system

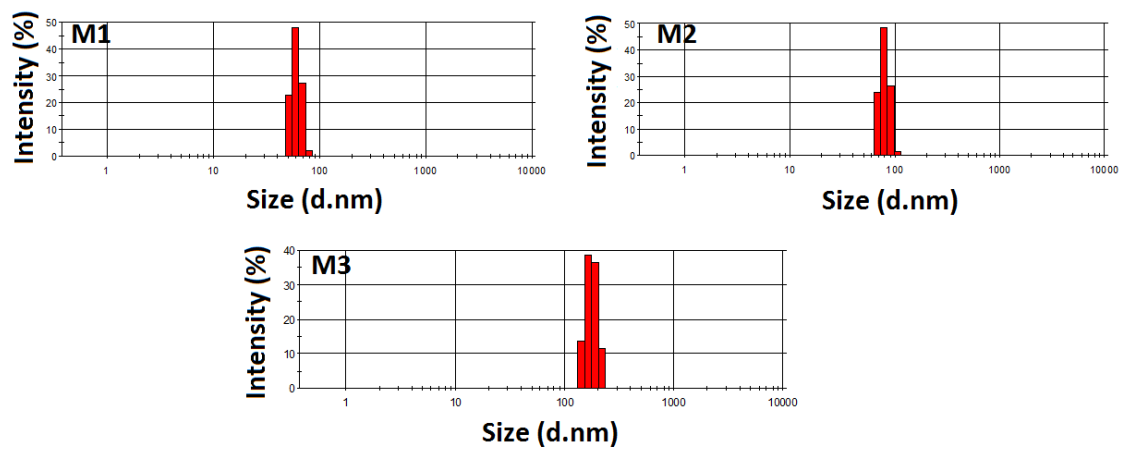

**Figure S17.** DLS plots of the hybrids **M1-M3** at 250 ppm concentration level in DMSO-H<sub>2</sub>O mixed solvent system

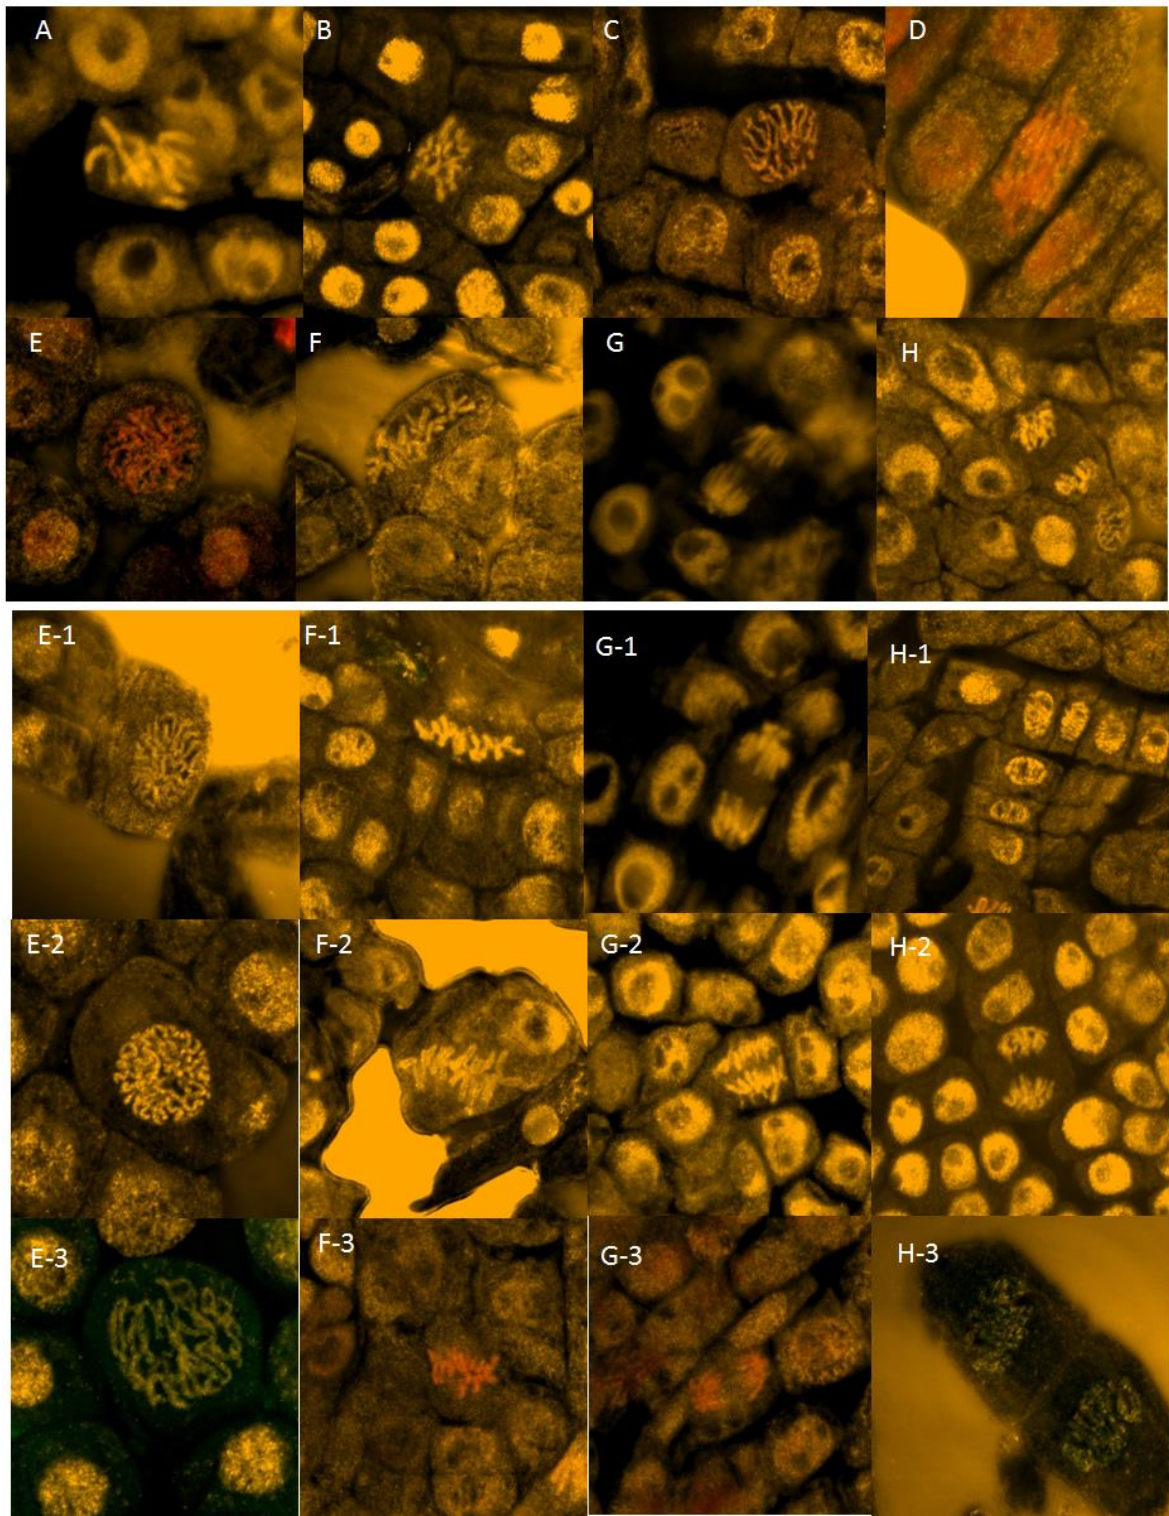



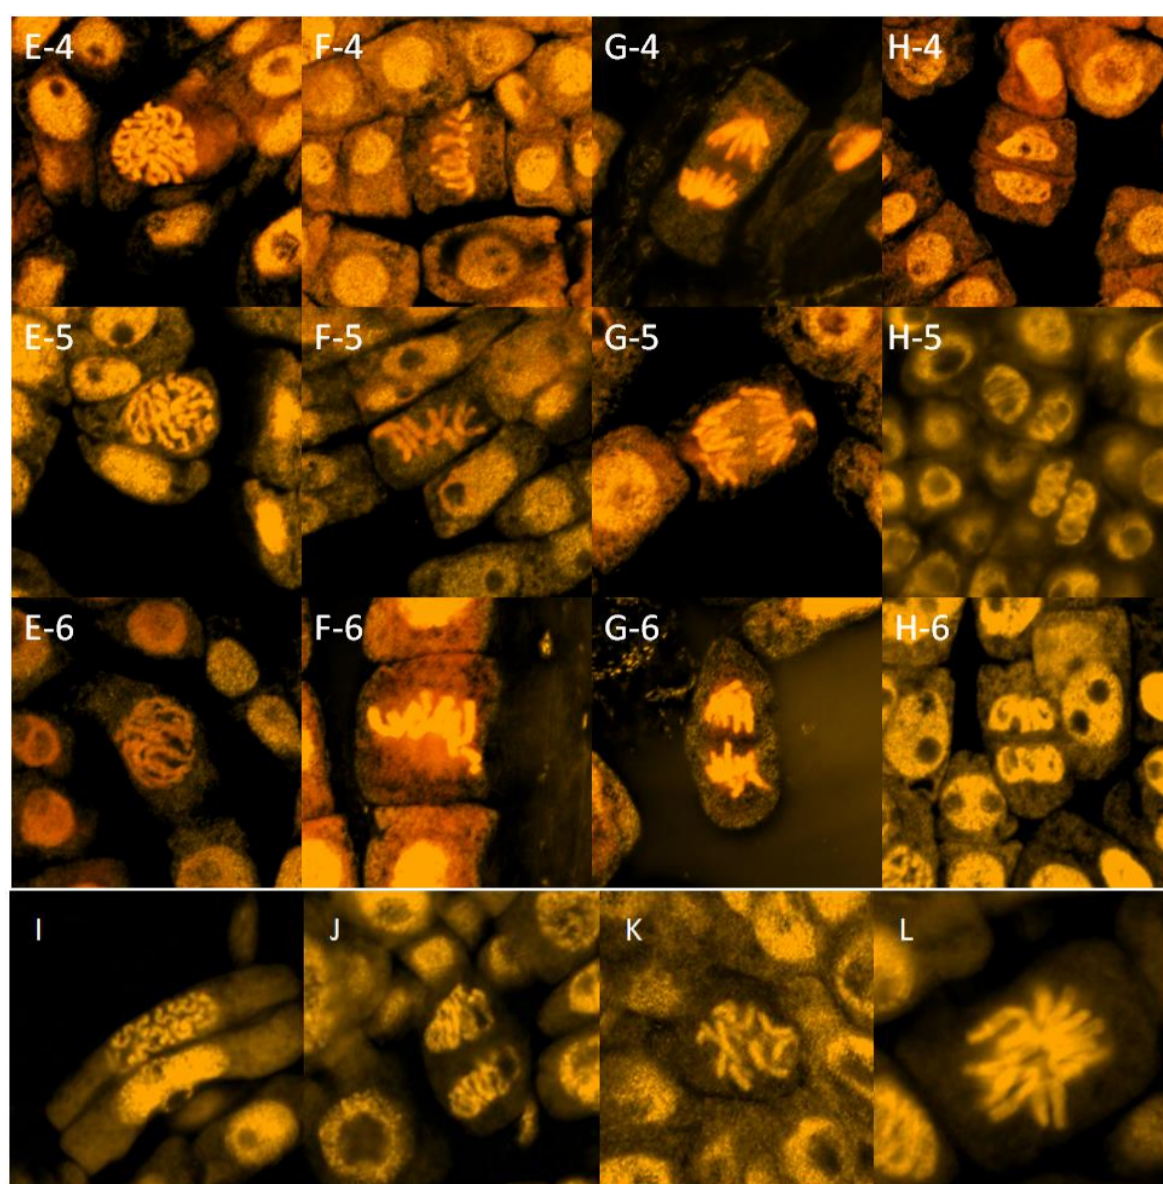

**Figure S18.** Cytotoxic damages observed in meristematic cells of *Allium cepa* roots treated with the H<sub>2</sub>O<sub>2</sub> (positive control) (A-D), distilled water – DMSO mixture (negative control) (E-H), **M1** (E-1 to H-1), **M2** (E-2 to H-2), **M3** (E-3 to H-3), **L1** (E-4 to H-4), **L2** (E-5 to H-5), **L3** (E-6 to H-6) and **C1** (I-L). (A) sticky metaphase, (B) chromosomes breaks at anaphase, (C) irregular prophase, (D) anaphase bridge, (E) prophase, (F) metaphase, (G) anaphase, (H) telophase, (E-1) prophase, (F-1) metaphase, (G-1) anaphase, (H-1) telophase, (E-2) prophase, (F-2) metaphase, (G-2) anaphase, (H-2) telophase, (E-3) prophase, (F-3) metaphase, (G-3) anaphase, (H-3) telophase, (E-4) prophase, (F-4) metaphase, (G-4) anaphase, (H-4) telophase, (E-5) prophase, (F-5) metaphase, (G-5) anaphase, (H-5) telophase, (E-6) prophase, (F-6) metaphase, (G-6) anaphase, (H-6) telophase, (I) distributed pole to pole arrangement of chromosomes at metaphase, (J) telophase laggard, (K) vagrant chromosome and (L) stellate anaphase.

**Table S10.** Mitotic indices and chromosomal aberration indices observed in *Allium cepa* meristematic root tip cells exposed for 4 hours to different concentrations **L1-L3**

| Treatment | Concentration (ppm) | No. of dividing cells | Mitotic Index MI (%) | No. of damaged cells | Chromosomal Aberration index CA (%) |
|-----------|---------------------|-----------------------|----------------------|----------------------|-------------------------------------|
| <b>L1</b> | 50                  | 209                   | 13.93±3.51           | 9                    | 0.60±1.52                           |
|           | 150                 | 192                   | 12.80±3.05           | 10                   | 0.66±1.0                            |
|           | 250                 | 188                   | 12.53±2.64           | 12                   | 0.80±1.15                           |
| <b>L2</b> | 50                  | 213                   | 14.20±4.04           | 11                   | 0.73±1.52                           |
|           | 150                 | 198                   | 13.20±1.52           | 11                   | 0.73±0.57                           |
|           | 250                 | 192                   | 12.80±3.05           | 13                   | 0.86±2.0                            |
| <b>L3</b> | 50                  | 198                   | 13.20±4.0            | 11                   | 0.73±0.57                           |
|           | 150                 | 187                   | 12.46±3.21           | 13                   | 0.86±1.15                           |
|           | 250                 | 181                   | 12.06±2.30           | 15                   | 1.0±1.73                            |

Mitotic and aberration indices were calculated as: (number of dividing cells or damaged cells/total number of cells observed) × 100.

The genotoxic properties of the organic moieties **L1**, **L2** and **L3** were also investigated as controls and the results are given in Table S10. The mitotic indices shown by **L1**, **L2** and **L3** at 250 ppm concentration were 12.53 %, 12.80 % and 12.06 % respectively; whereas the chromosomal aberration indices shown by **L1**, **L2** and **L3** at 250 ppm were 0.80 %, 0.86 % and 1.0 % respectively. These values are close to the mitotic and chromosomal aberrations exhibited by the negative control (distilled water-DMSO mixture) at 250 ppm level and thus show the relatively low toxic nature of these organic derivatives.

#### Genotoxicity tests using *Allium cepa* cells

The genotoxicity test was conducted according to a reported protocol<sup>13</sup> with slight modifications. Clean and healthy bulbs of *A. cepa* were selected for the study. The outer scales and dried roots were removed carefully without damaging the meristematic tissues. A series of six onion bulbs were placed in fresh distilled water for 72 h in dark. Distilled water was changed daily. After a period of 3 days, bulbs with best root growth (2–2.5 cm) were selected for the treatment. The standard 50, 150, 250 ppm solutions of TBA<sub>3</sub>[MnMo<sub>6</sub>O<sub>18</sub>{(OCH<sub>2</sub>)<sub>3</sub>C-NH<sub>2</sub>}<sub>2</sub>], **L1-L3** and **M1-M3** were prepared in DMSO which were then diluted with distilled water before the analyses. The roots separated from the bulb were exposed to different concentrations (50, 150 and 250 ppm) of the above solutions for a period of 4 h. As positive and negative controls, some root cells were treated with 250 ppm of H<sub>2</sub>O<sub>2</sub> in distilled water (5mL) and different concentrations of distilled water-DMSO mixtures (5 mL) respectively. All the experiments were

carried out in triplicate. The chromosomal aberration was analysed by root meristem squash technique<sup>14</sup> using Nikon Eclipse LV100 POL optical microscopy. The root tips exposed to different concentrations of hybrids **M1-M3** were fixed in 95% ethanol and glacial acetic acid (3:1, v/v) for 5 minutes. After that, the solution was drained off and washed the root tips with distilled water. These were then macerated in 1N HCl at 60 °C for 2-3 min. to soften the tissue and washed again with distilled water three times. These root tips were then placed on microscopic slides and stained with one drop of acetocarmine solution for 2 minutes. The stained root tips were sealed with cover slip in order to prevent drying<sup>15</sup> and squashed by applying slight pressure to spread the root tip tissues. Three slides were prepared for each concentration including the control (positive and negative). These slides were then observed at 1000 x magnification for cell division and cytogenetic abnormalities. The Mitotic Index (MI) was calculated as the percentage ratio of dividing cells and total number of cells scored (1500) and expressed as percent of negative control.<sup>16</sup> The chromosome aberrations were examined and used as genetic end points for determining cytogenetic effects in inter phase per 1500 cells.<sup>17</sup> The results are expressed as the mean  $\pm$  SD (standard deviation).

## References:

1. A. P. Ginsberg, *Inorganic Synthesis*, John Wiley & Sons, Inc., New York, 1990, **27**, 78.
2. *CrysAlisPro Program*, version 171.37.33c, Agilent Technologies, Oxford, 2012.
3. G. M. Sheldrick, *Acta Crystallogr.*, 2008, **A64**, 112–122.
4. O. V. Dolomanov, L. J. Bourhis, R. J. Gildea, J. A. K. Howard and H. J. Puschmann, *J. Appl. Crystallogr.*, 2009, **42**, 339–341.
5. A. L. Spek, PLATON, *Acta Cryst.*, 2009, **D65**, 148-155.
6. V. S. V. Satyanarayana and A. Sivakumar, *Ultrasonics Sonochemistry*, 2011, **18**, 917–922.
7. H. Rajak, R. Deshmukh, R. Veerasamy, A. K. Sharma, P. Mishra and M. D. Kharya, *Bioorg. Med. Chem. Lett.*, 2010, **20**, 4168–4172.
8. S. Goswami and R. Chakrabarty, *Tetrahedron Lett.*, 2009, **50**, 5994–5997.
9. H. Kaur, S. Kumar, P. Vishwakarma, M. Sharma, K. K. Saxena and A. Kumar, *Eur. J. M. Chem.*, 2010, **45**, 2777–2783.
10. C. Allain, S. Favette, L.-M. Chamoreau, J. Vaissermann, L. Ruhlmann and B. Hasenknopf, *Eur. J. Inorg. Chem.*, 2008, 3433–3441.
11. P. Yin, C. P. Pradeep, B. Zhang, F.-Y. Li, C. Lydon, M. H. Rosnes, D. Li, E. Bitterlich, L. Xu, L. Cronin and T. Liu, *Chem. Eur. J.*, 2012, **18**, 8157–8162.
12. (a) P. Yin, P. Wu, Z. Xiao, D. Li, E. Bitterlich, J. Zhang, P. Cheng, D. V. Vezenov, T. Liu and Y. Wei, *Angew. Chem.*, 2011, **123**, 2569–2573; (b) J. Zhang, Y.-F. Song, L. Cronin and T. Liu, *Chem. Eur. J.*, 2010, **16**, 11320–11324.
13. (a) J. Rank and M. H. Nielsen, *Hereditas*, 1993, **118**, 49-53; (b) A. S. A. Prasad, V.S.V. Satyanarayana and K.V. B. Rao, *J. Hazard. Mater.*, 2013, **262**, 674–684.
14. A. K. Sharma, A. Sharma, *Chromosome technique theory and practice*, 3<sup>rd</sup>ed., Butterworths, London, UK, 1980, pp. 474.
15. C. B. S. R. Sharma, *Curr. Sci.*, 1983, **52**, 1000–1002.
16. G. Fiskesjo, Allium test for screening chemicals; evaluation of cytological parameters, in: W. Wang, J. W. Gorsuch and J. S. Hughes (eds.), *Plants and Environmental Studies*, Lewis Publishers Inc, New York, NY, 1997, pp. 308–333.
17. A. A. Bakare, A. A. Mosuro and O. Osibanjo, *J. Environ. Biol*, 2000, **21**, 263–271.
